# Supplementary material for: Selective in vitro anti-cancer activity of non-alkylating minor groove binders
Source: Royal Society of Chemistry journal article supplement (doi:10.1039/c9md00268e), 2019-01-01
Supplement: c9md00268e1.pdf [file c9md00268e1.pdf]

# Selective *in vitro* anti-cancer activity of non-alkylating minor groove binders

Ryan J. O. Nichol,<sup>1</sup> Abedawn I. Khalaf,<sup>2</sup> Kartheek Sooda,<sup>3</sup> Omar Hussain,<sup>3</sup> Hollie B S Griffiths,<sup>1</sup> Roger Phillips,<sup>3</sup> Farideh A Javid,<sup>3</sup> Colin J. Suckling,<sup>2</sup> Simon J. Allison,<sup>1</sup> Fraser J. Scott<sup>2</sup>

<sup>1</sup>Department of Biological and Geographical Sciences, School of Applied Sciences, University of Huddersfield, Huddersfield, UK.

<sup>2</sup>Department of Pure and Applied Chemistry, WestCHEM, University of Strathclyde, Glasgow, UK

<sup>3</sup>Department of Pharmacy, School of Applied Sciences, University of Huddersfield, Huddersfield, UK.

## Supplementary Information

Below is presented the <sup>1</sup>H NMR, HR-MS and IR data for each of the novel MGBs.

### MGB-371

<sup>1</sup>H NMR (*d*<sub>6</sub>-DMSO)

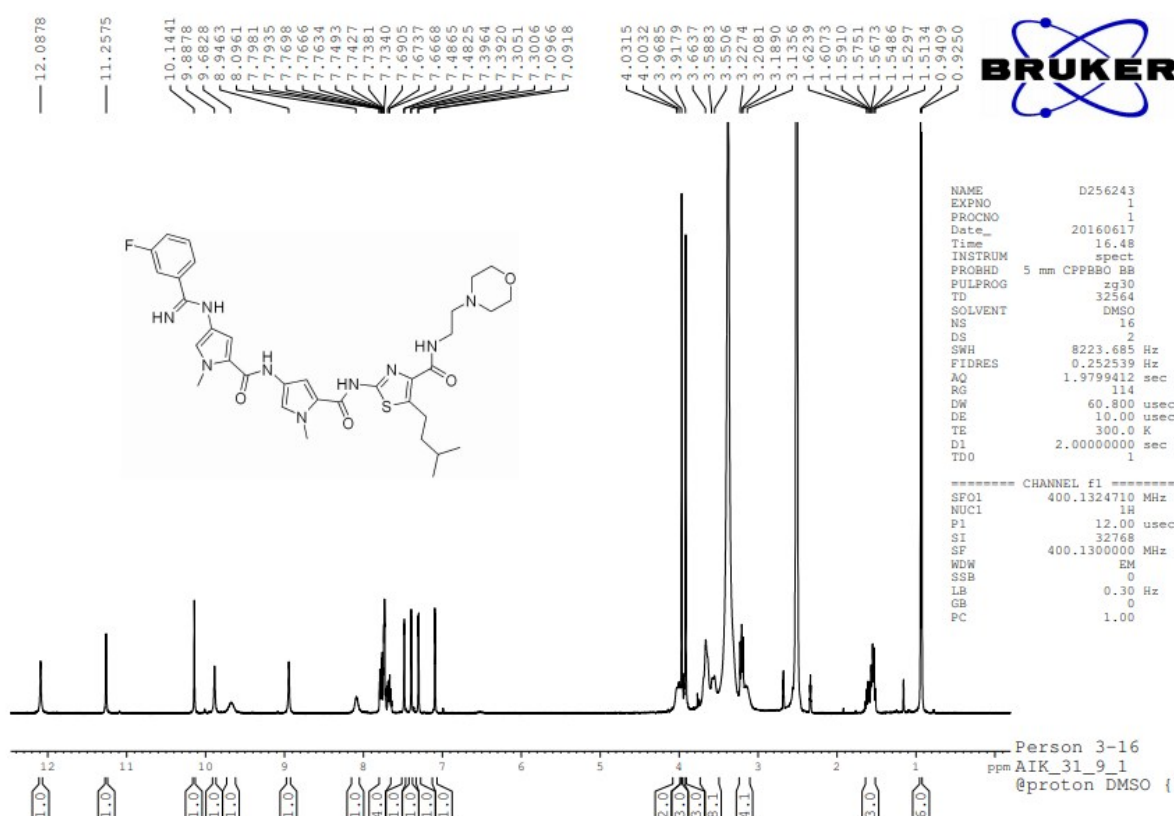

# HRMS

AIK-31-9-1 #105 RT: 1.24 AV: 1 SB: 11 0.95-1.07, 1.60-1.71 NL: 8.20E8  
T: FTMS (1,1) + p ESI Full lock ms [75.00-1500.00]

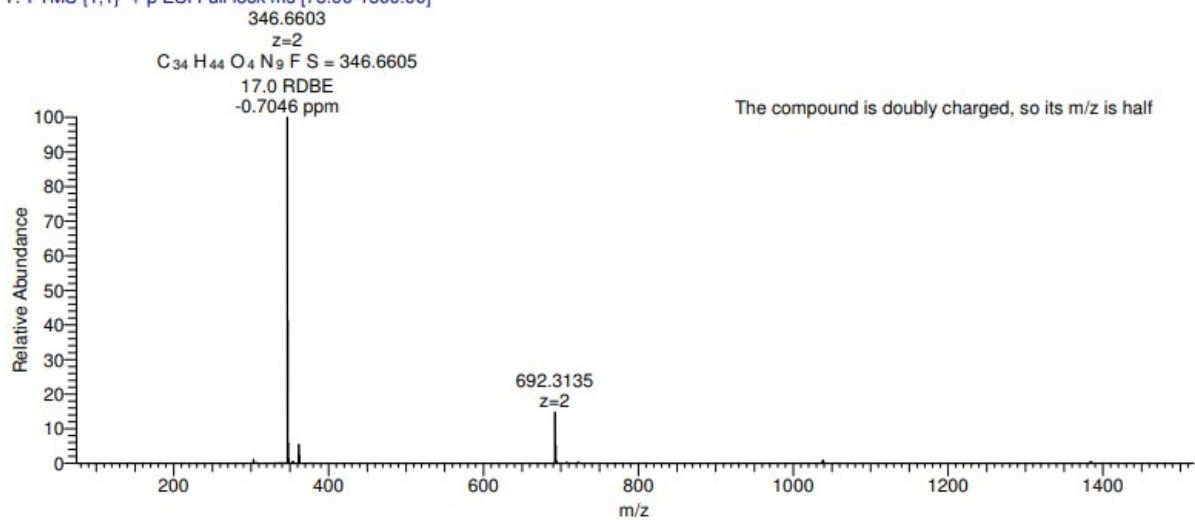

# IR

AIK\_31\_9\_1

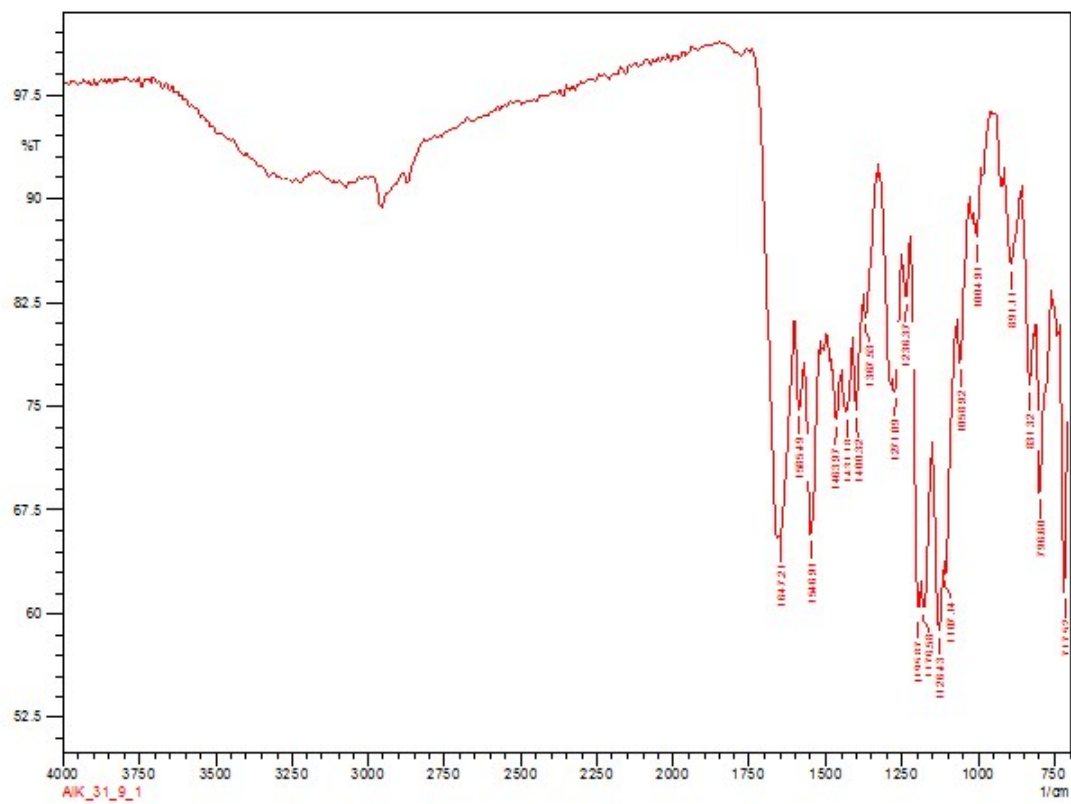

Peaks: 718, 797, 831, 891, 1005, 1059, 1107, 1126, 1177, 1196, 1236, 1271, 1368, 1400, 1431, 1464, 1547, 1586, 1647 cm<sup>-1</sup>

# MGB-372

$^1\text{H}$  NMR ( $d_6$ -DMSO)

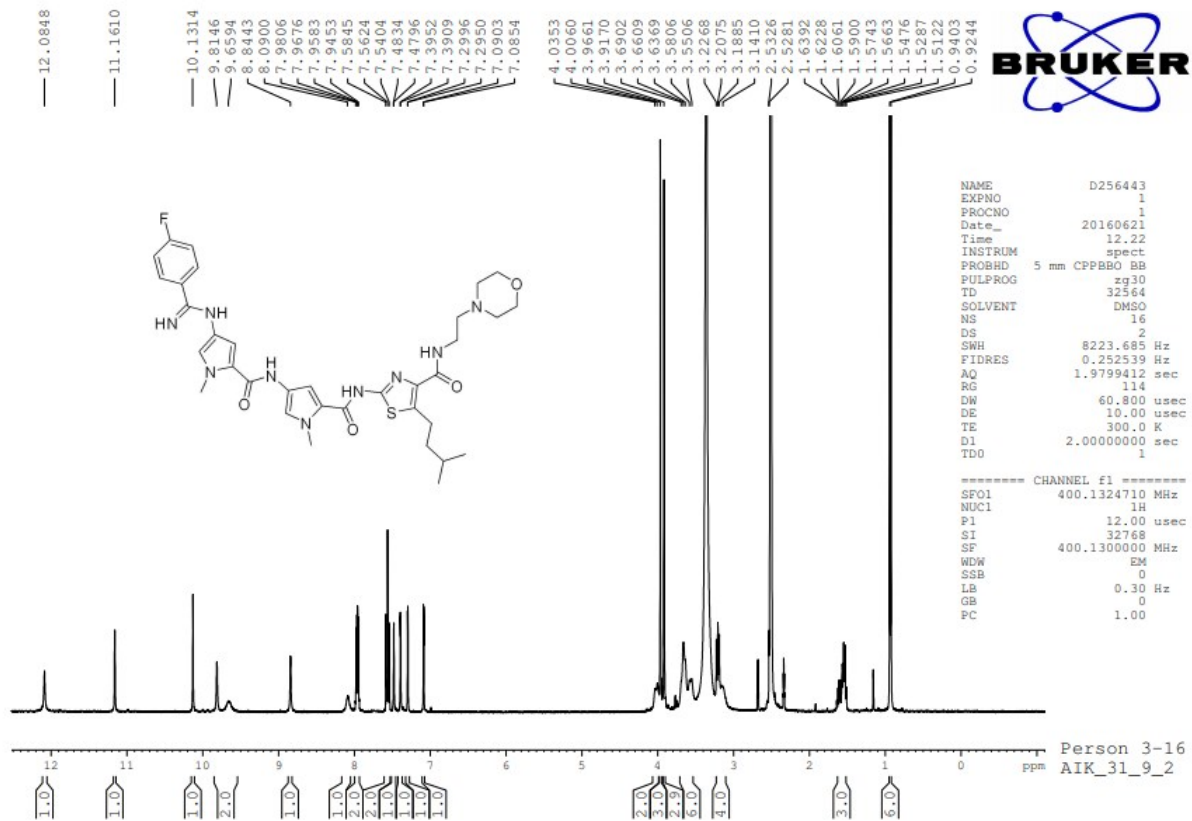

## HRMS

AIK-31-9-2 #95 RT: 1.23 AV: 1 SB: 11 0.96-1.08 , 1.59-1.72 NL: 7.99E8  
T: FTMS (1,1) + p ESI Full lock ms [75.00-1500.00]

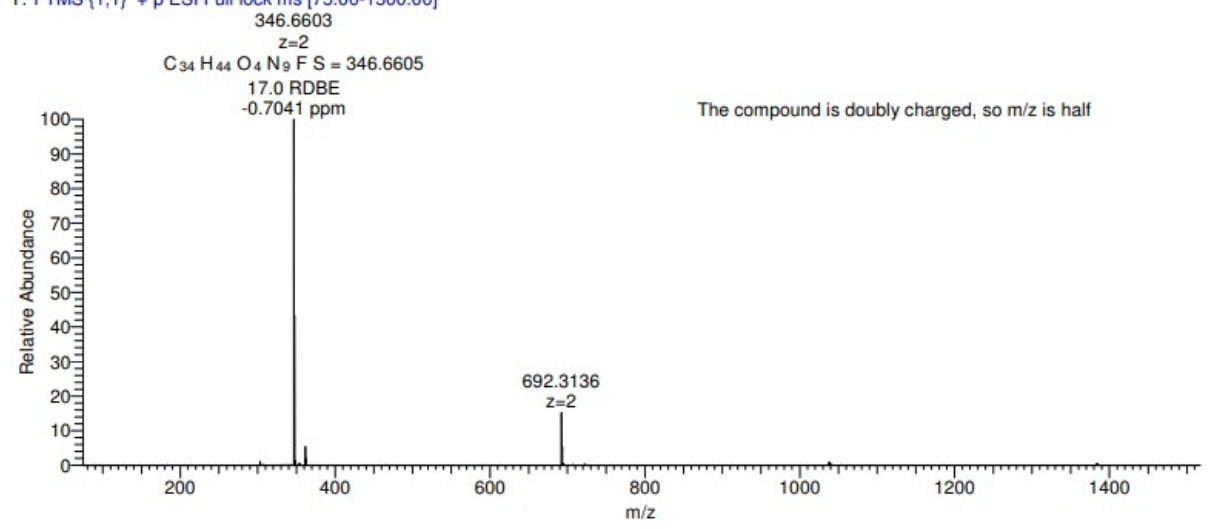

IR

AIK\_31\_9\_2

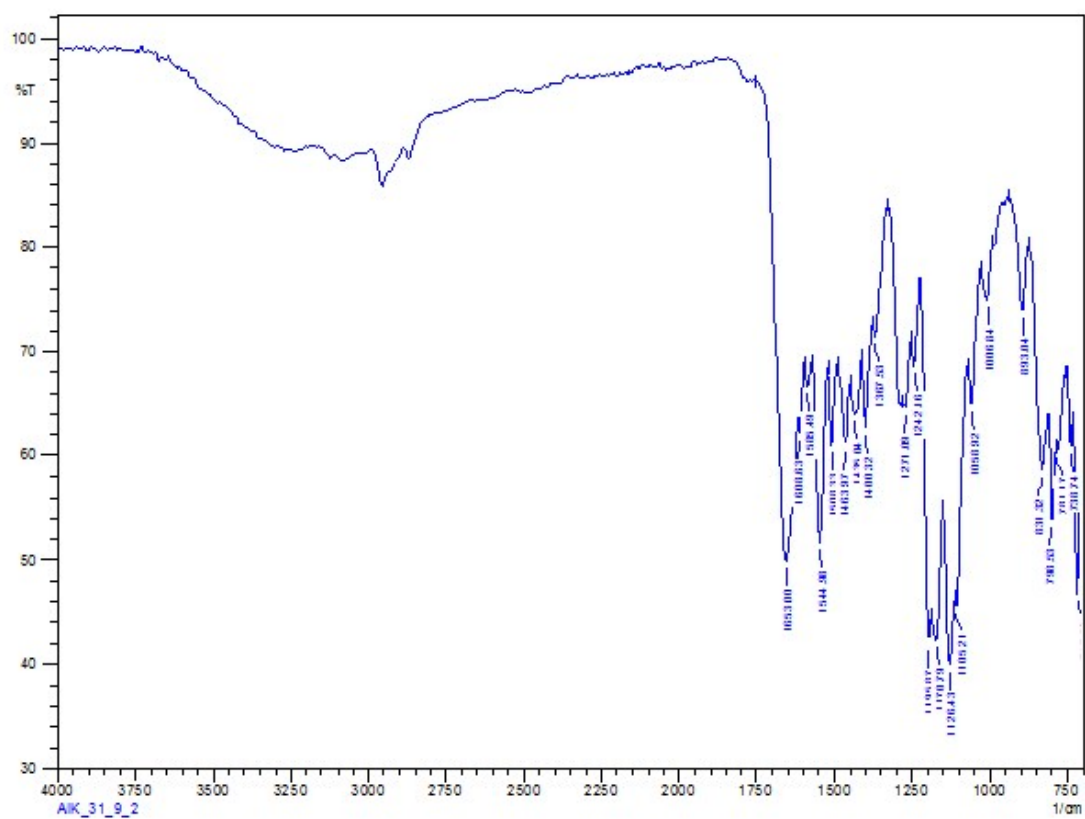

Peaks: 718, 739, 781, 799, 831, 893, 1007, 1059, 1105, 1126, 1171, 1196, 1242, 1271, 1368, 1400, 1435, 1464, 1508, 1545, 1586, 1609, 1653 cm<sup>-1</sup>

# MGB-373

<sup>1</sup>H NMR (d<sub>6</sub>-DMSO)

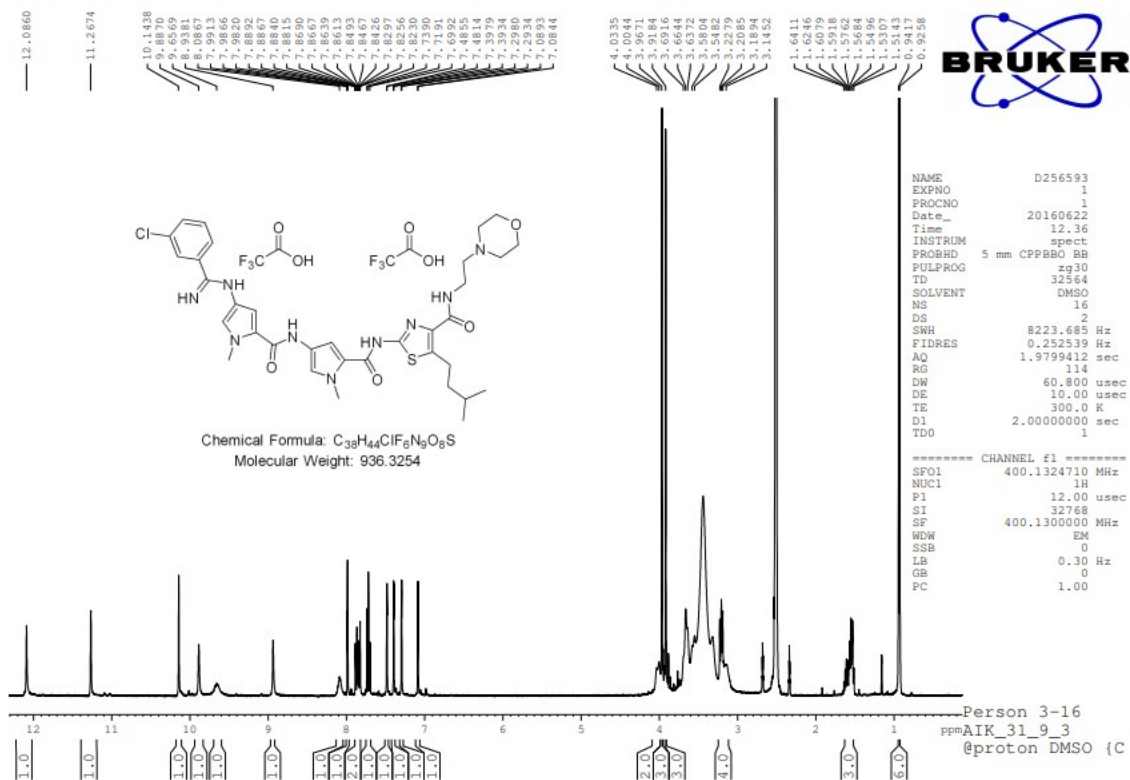

## HRMS

AIK-31-9-3 #99 RT: 1.24 AV: 1 SB: 10 0.95-1.08 , 1.59-1.72 NL: 6.03E8  
T: FTMS {1,1} + p ESI Full lock ms [75.00-1500.00]

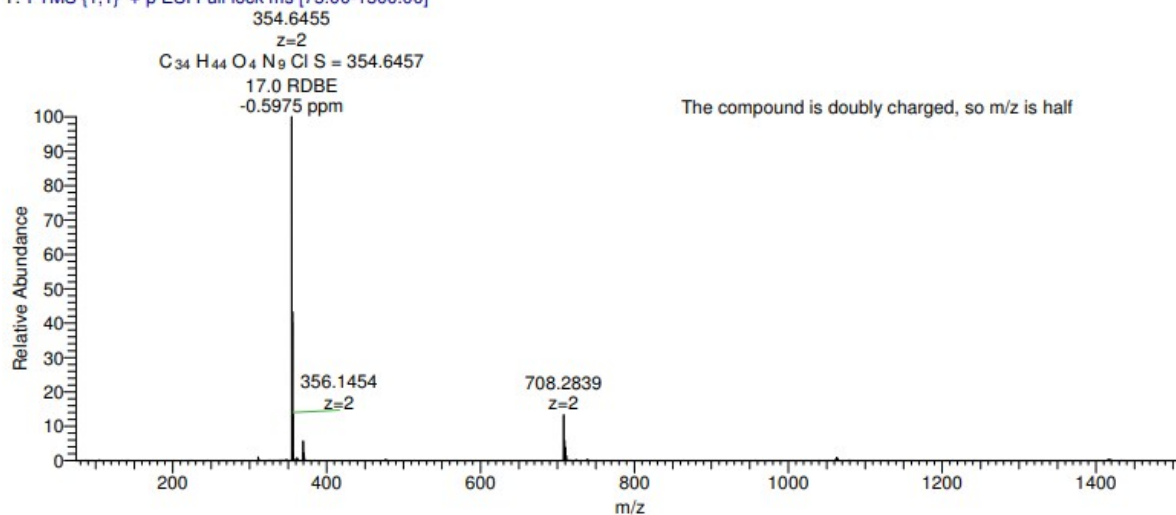

IR

AIK\_31\_9\_3

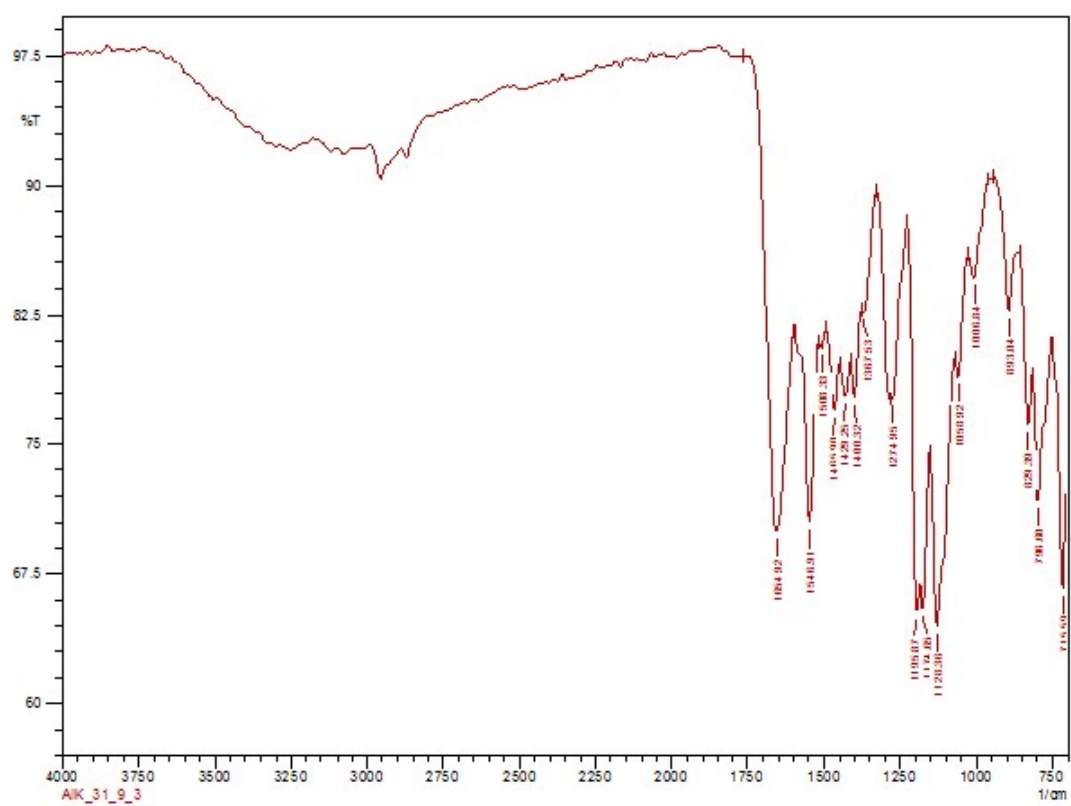

Peaks: 716, 797, 829, 893, 1007, 1059, 1128, 1175, 1196, 1275, 1368, 1400, 1429, 1466, 1508, 1547, 1655 cm<sup>-1</sup>

# MGB-374

$^1\text{H}$  NMR ( $d_6$ -DMSO)

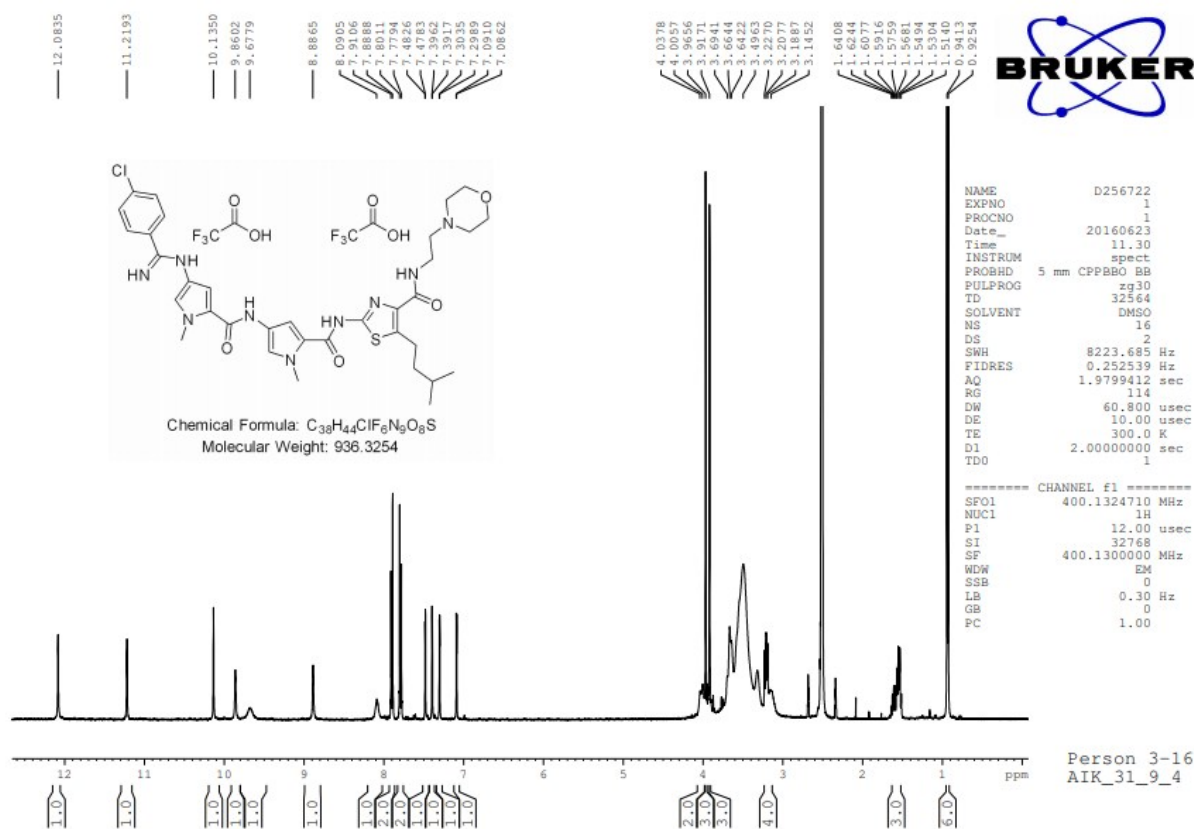

## HRMS

AIK-31-9-4 #99 RT: 1.24 AV: 1 SB: 10 0.96-1.07, 1.60-1.72 NL: 6.51E8  
T: FTMS (1,1) + p ESI Full lock ms [75.00-1500.00]

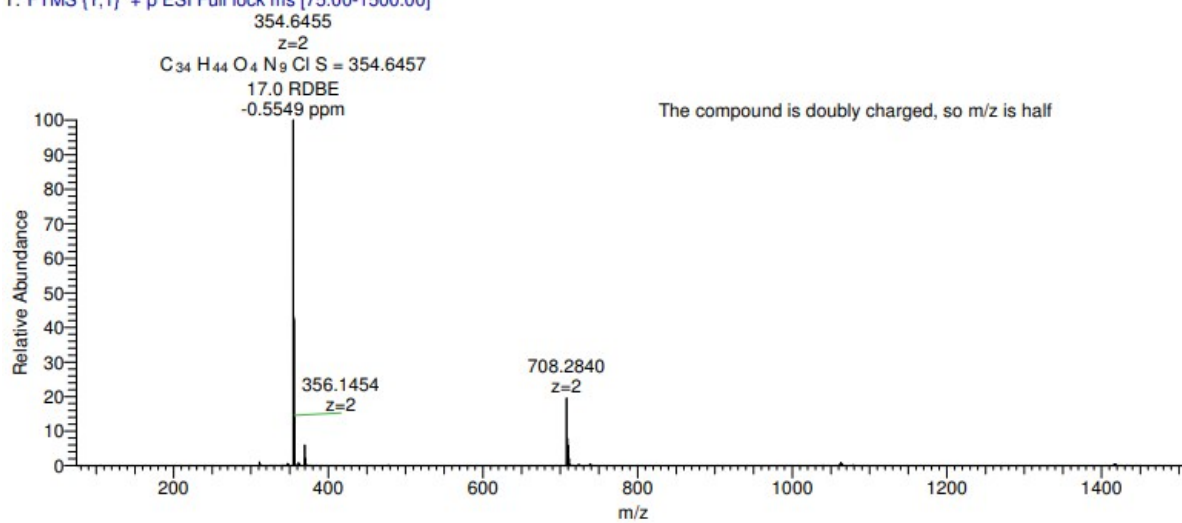

IR

AIK\_31\_9\_4

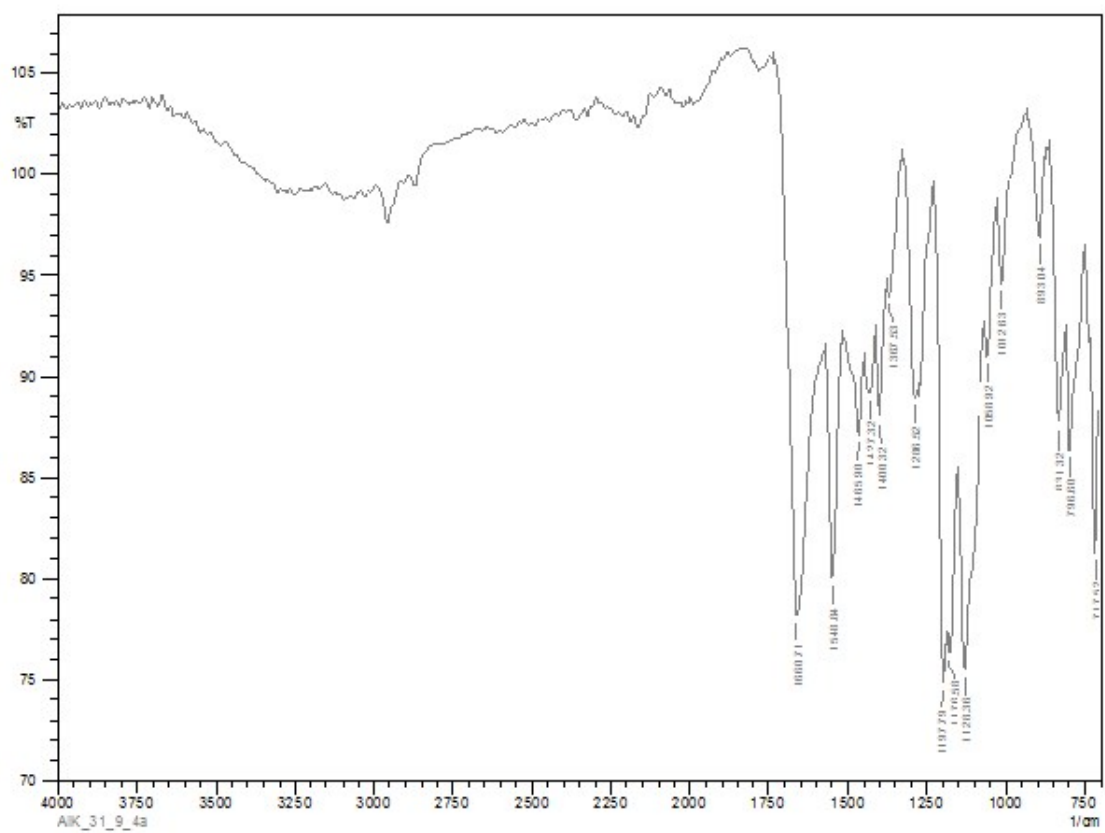

Peaks: 718, 797, 831, 893, 1013, 1059, 1128, 1177, 1198, 1287, 1368, 1400, 1427, 1466, 1549, 1661  $\text{cm}^{-1}$



# MGB-376

$^1\text{H}$  NMR ( $d_6$ -DMSO)

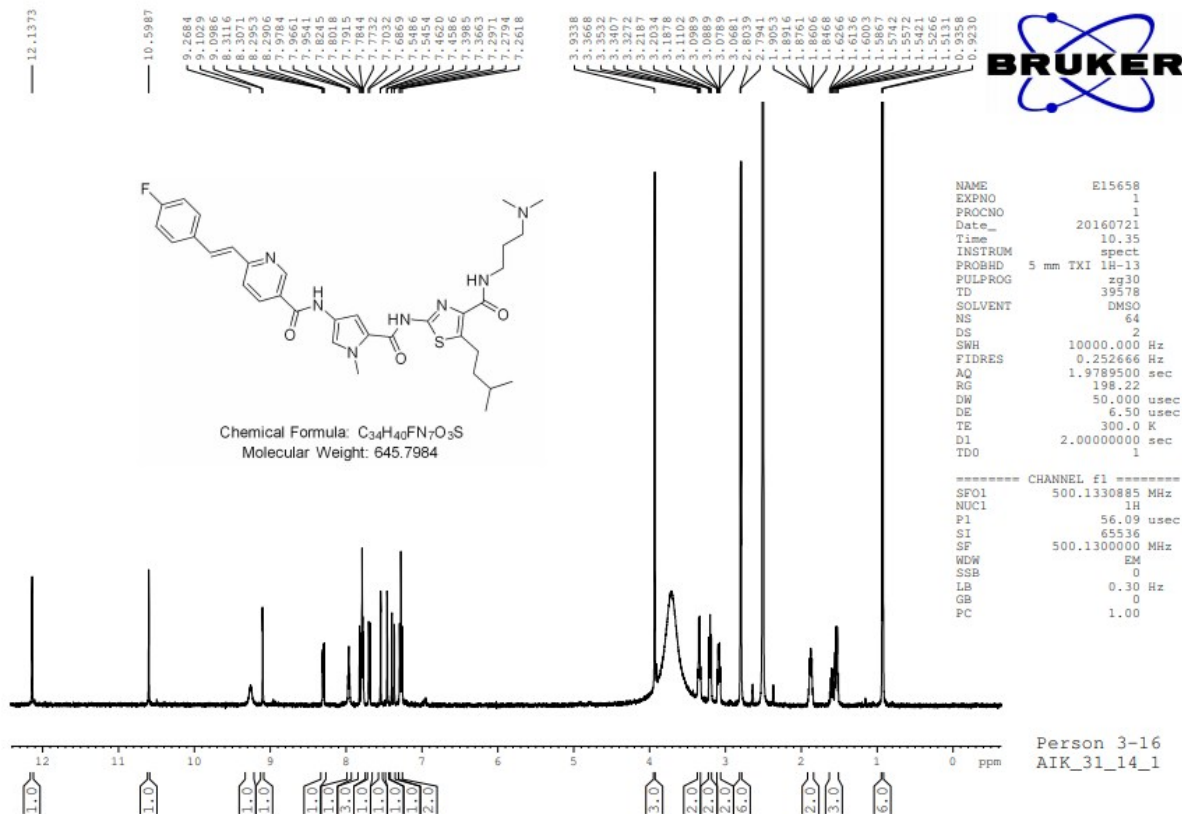

## HRMS

AIK-31-14-1 #119 RT: 1.41 AV: 1 SB: 12 0.95-1.08, 1.59-1.71 NL: 2.38E8  
T: FTMS (1,1) + p ESI Full lock ms [75.00-1500.00]

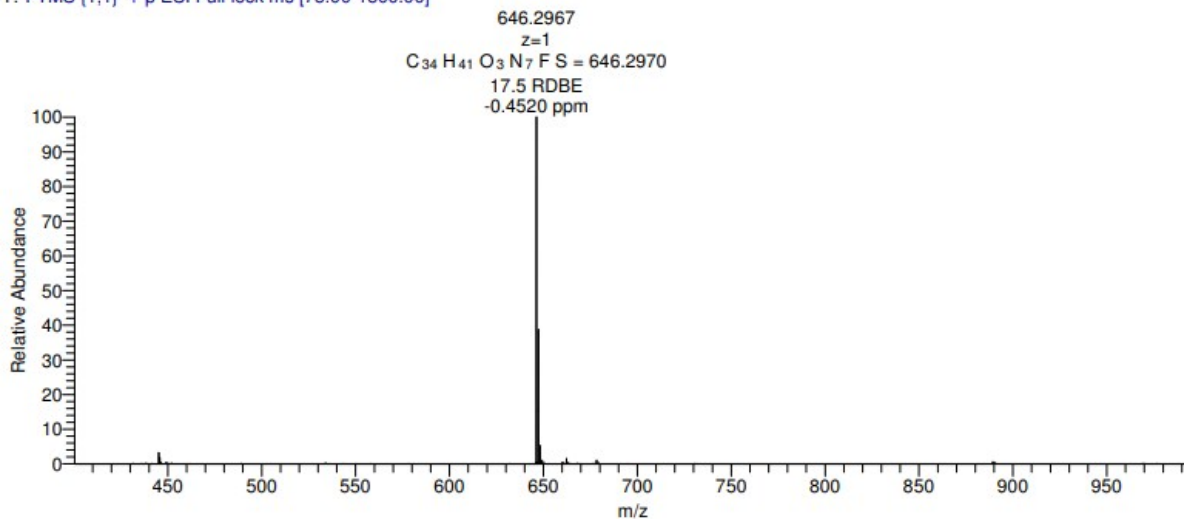

IR

AIK\_31\_14\_1

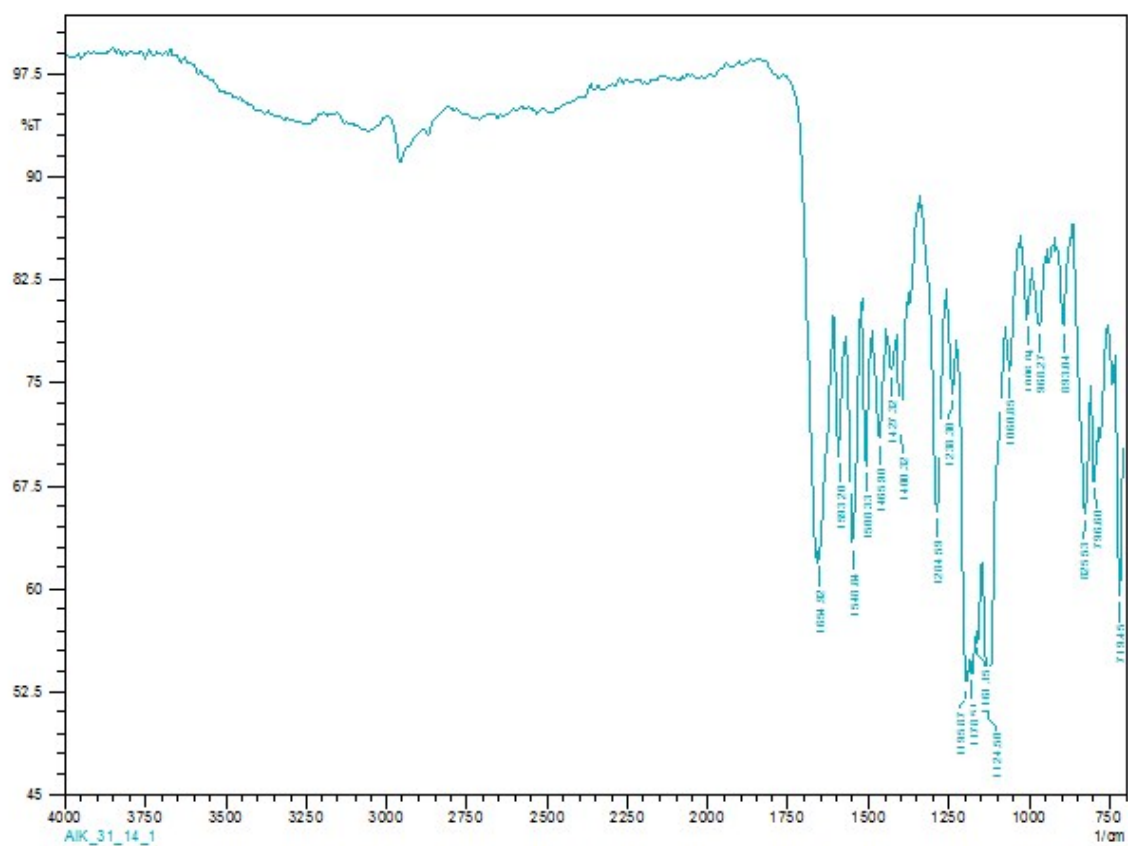

Peaks: 720, 797, 826, 893968, 1007, 1061, 1125, 1161, 1179, 1196, 1238, 1285, 1400, 1427, 1466, 1508, 1549, 1593, 1655 cm<sup>-1</sup>

# MGB-377

<sup>1</sup>H NMR (d<sub>6</sub>-DMSO)

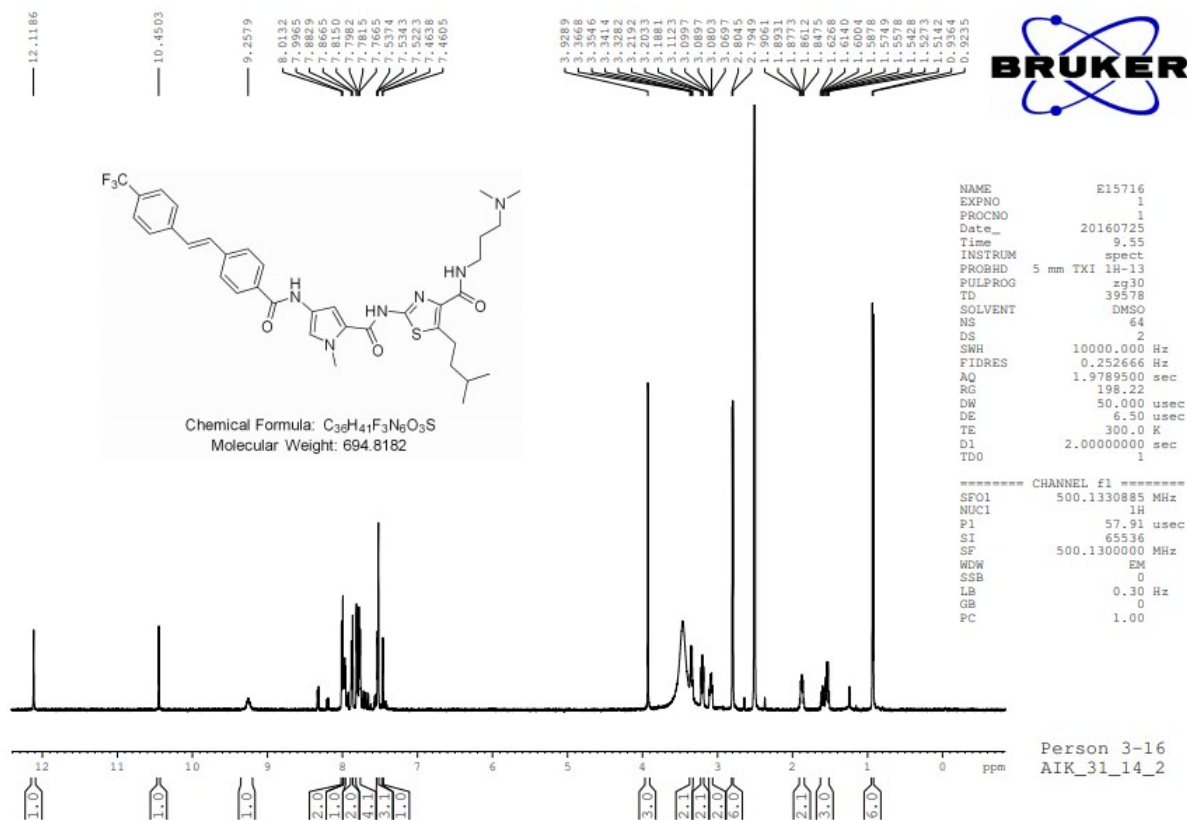

## HRMS

AIK-31-14-2 #85 RT: 2.37 AV: 1 NL: 7.79E8  
T: FTMS {1,1} + p ESI Full lock ms [85.00-1200.00]

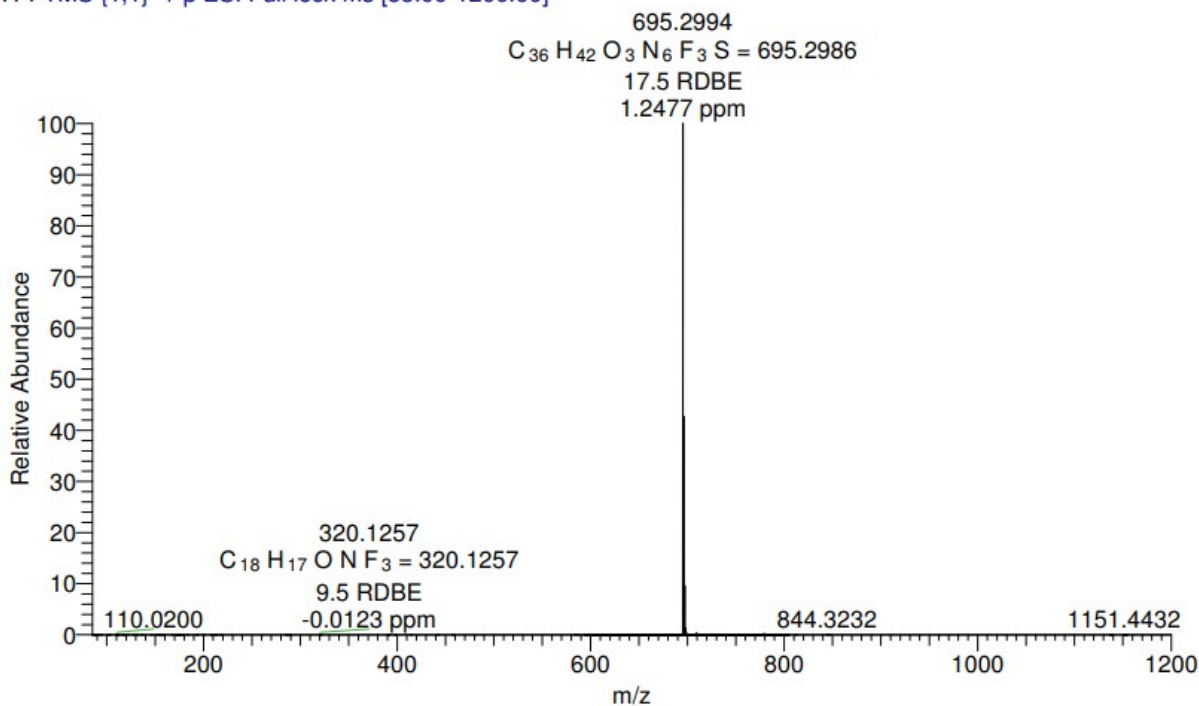

IR

AIK-31\_14\_2

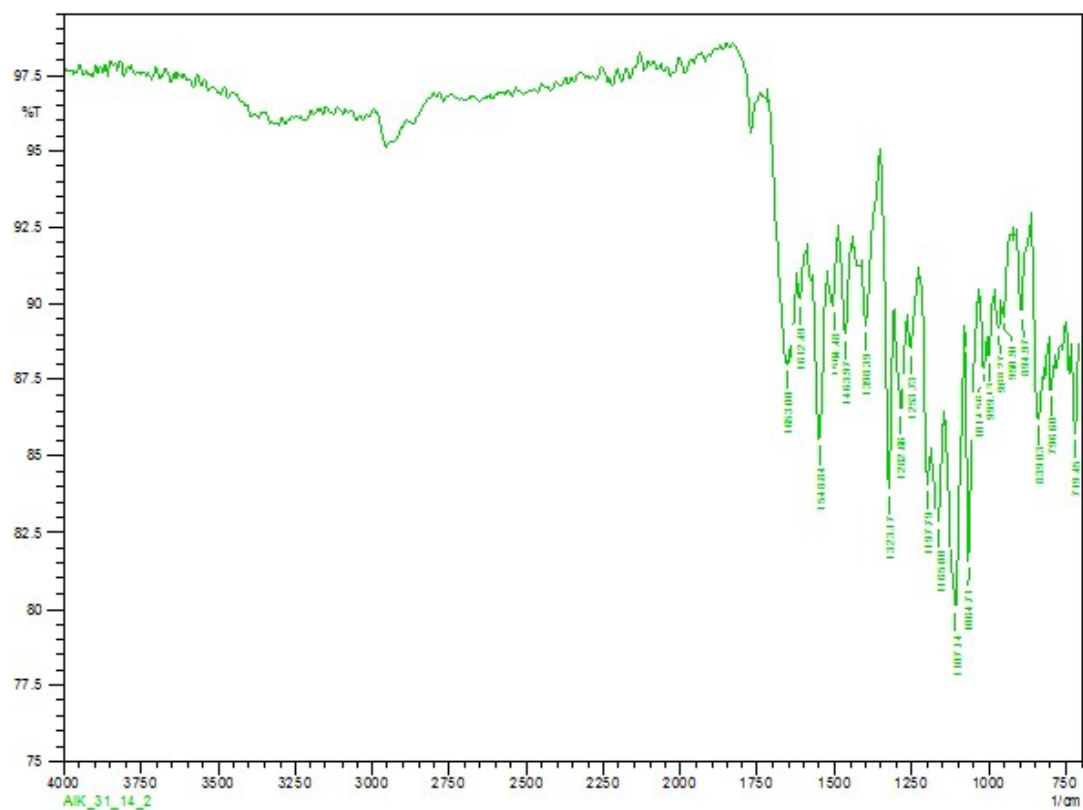

Peaks: 720, 797, 839, 895, 951, 968, 999, 1015, 1065, 1107, 1165, 1198, 1254, 1283, 1323, 1398, 1464, 1505, 1549, 1613, 1653  $\text{cm}^{-1}$

# MGB-378

<sup>1</sup>H NMR (d<sub>6</sub>-DMSO)

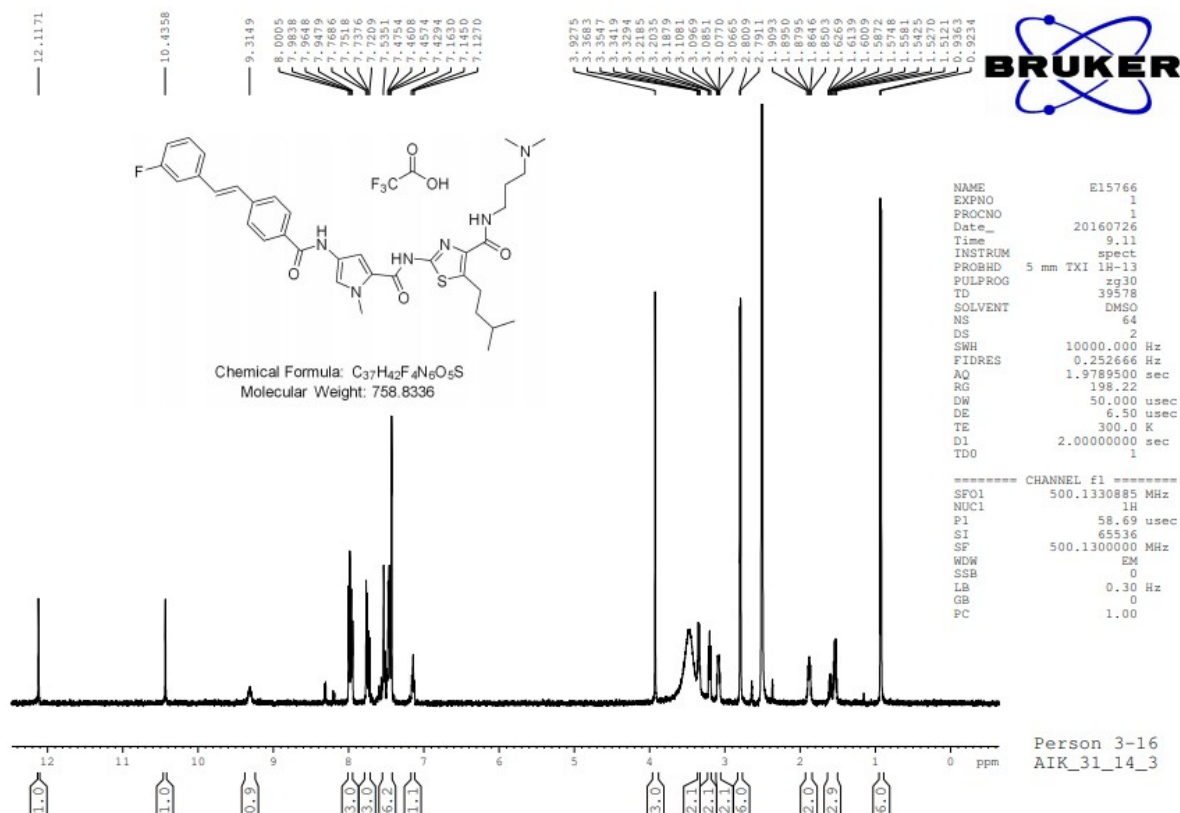

## HRMS

AIK-31-14-3 #61 RT: 1.74 AV: 1 NL: 1.08E9  
T: FTMS {1,1} + p ESI Full lock ms [85.00-1200.00]

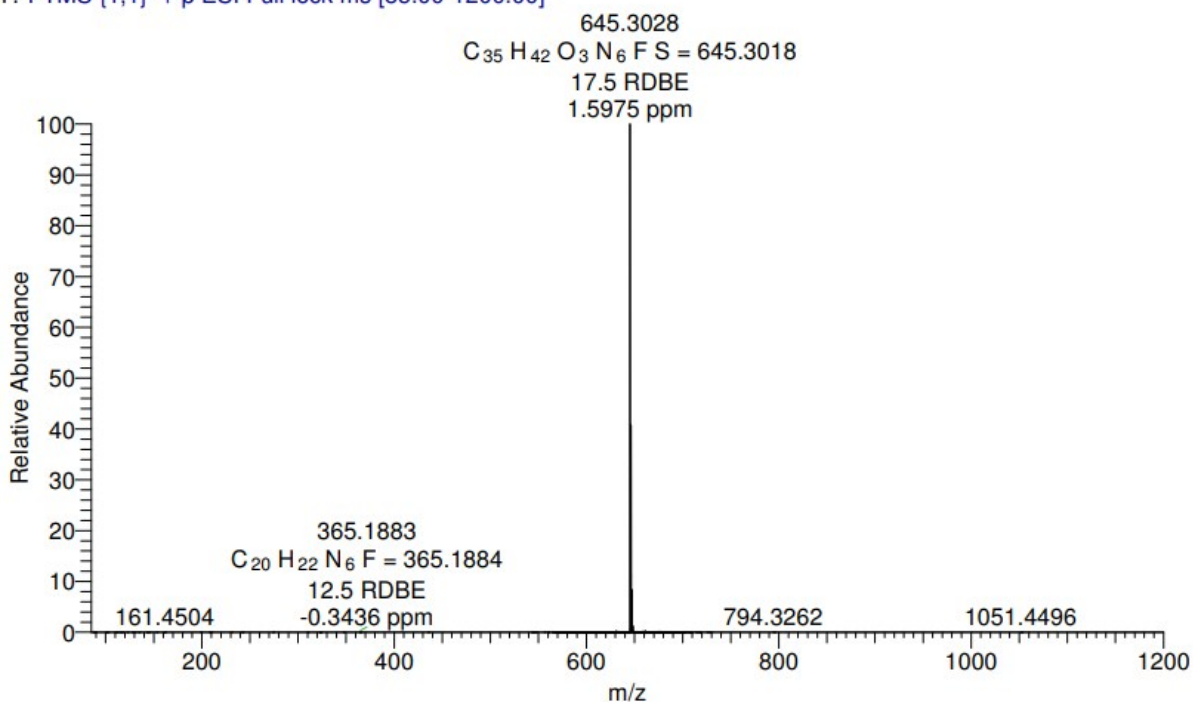

IR

AIK\_31\_14\_3

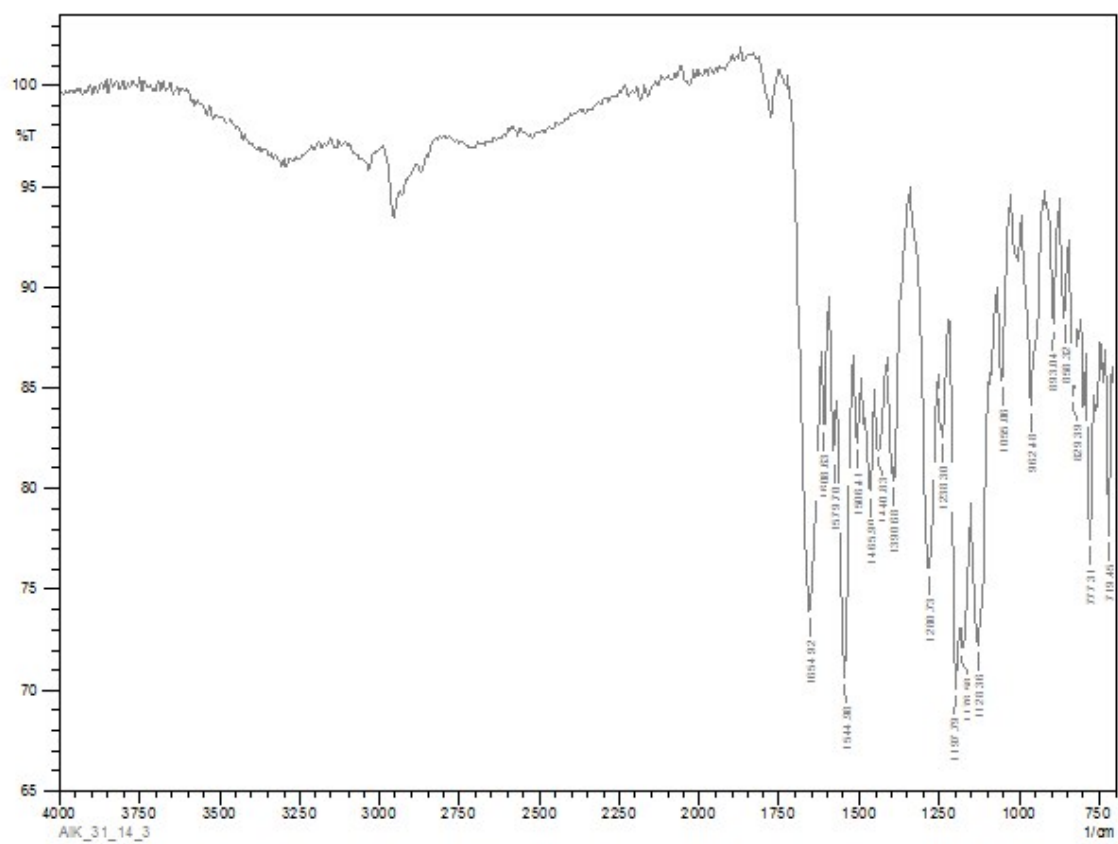

Peaks: 7120, 777, 829, 858, 893, 963, 1055, 1128, 1177, 1198, 1238, 1281, 1391, 1441, 1466, 1506, 1545, 1580, 1609, 1655  $\text{cm}^{-1}$

# MGB-376

<sup>1</sup>H NMR (d<sub>6</sub>-DMSO)

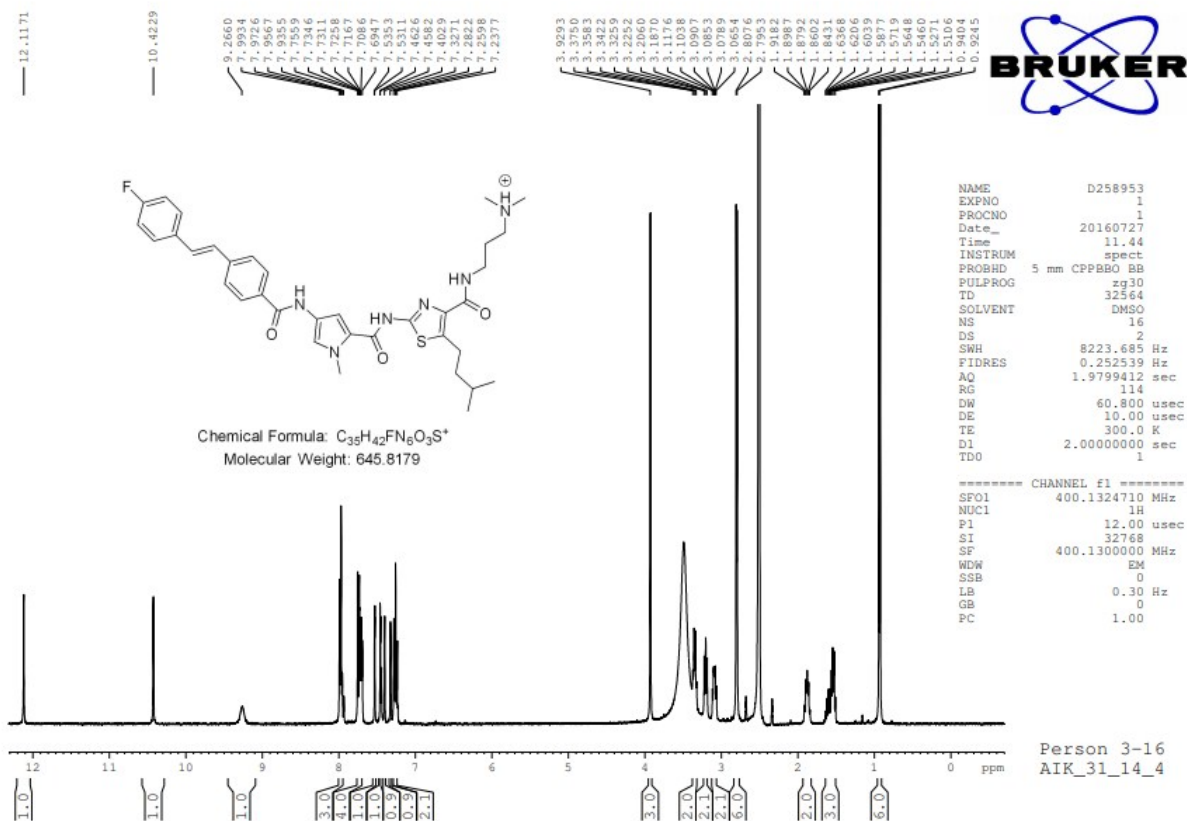

## HRMS

AIK-31-14-4 #61 RT: 1.73 AV: 1 NL: 1.05E9  
T: FTMS {1,1} + p ESI Full lock ms [85.00-1200.00]

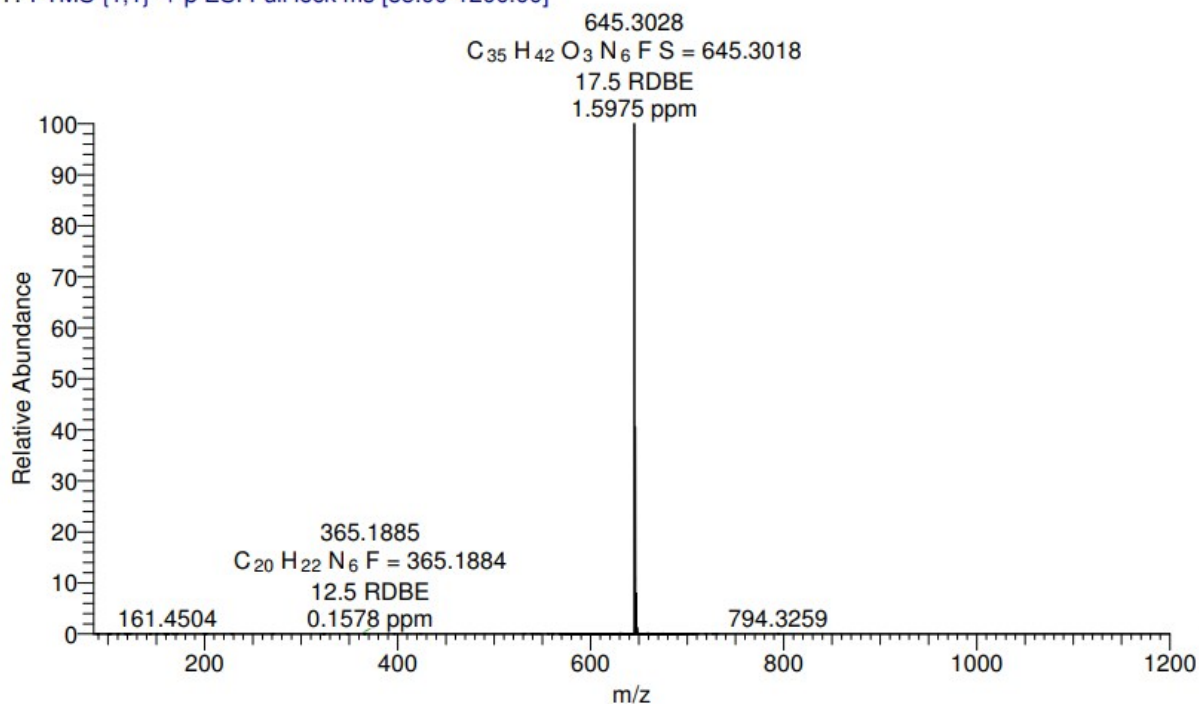

IR

AIK\_31\_14\_4

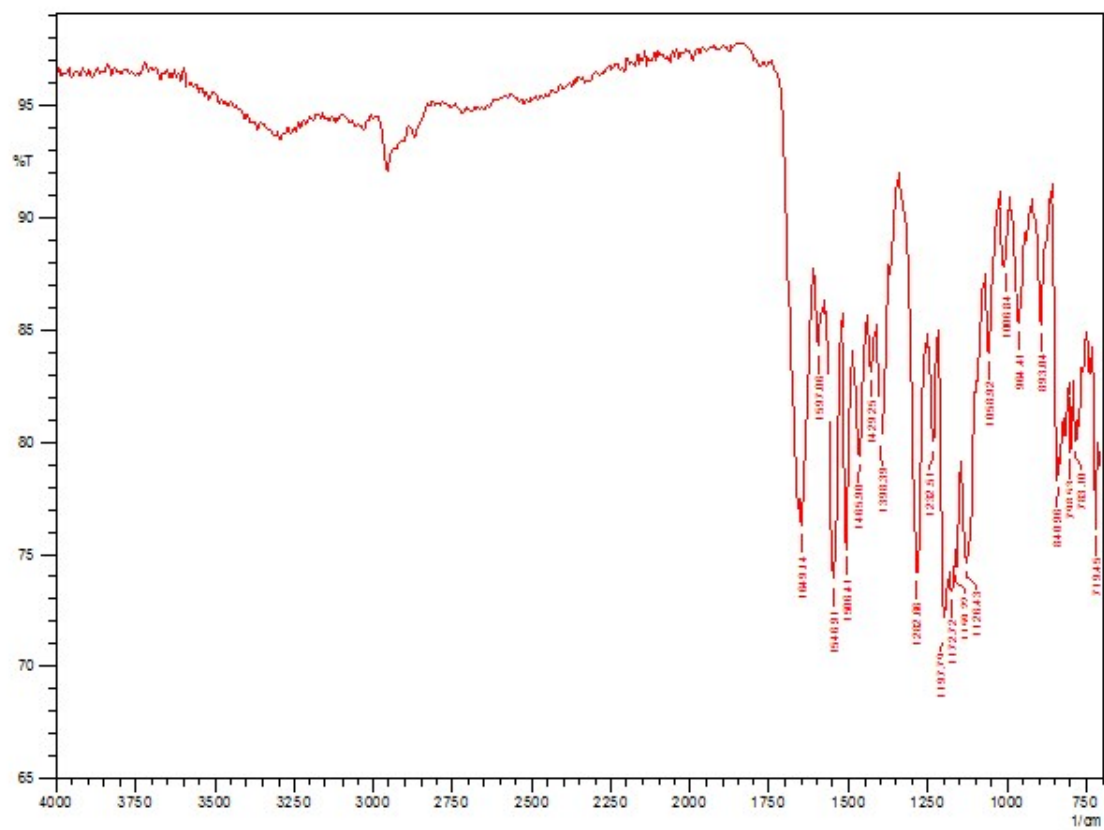

Peaks: 720, 783, 799, 841, 893, 964, 1007, 1059, 1126, 1159, 1173, 1198, 1233, 1283, 1398, 1429, 1466, 1506, 1547, 1597, 1649  $\text{cm}^{-1}$



# MGB-380

<sup>1</sup>H NMR (d<sub>6</sub>-DMSO)

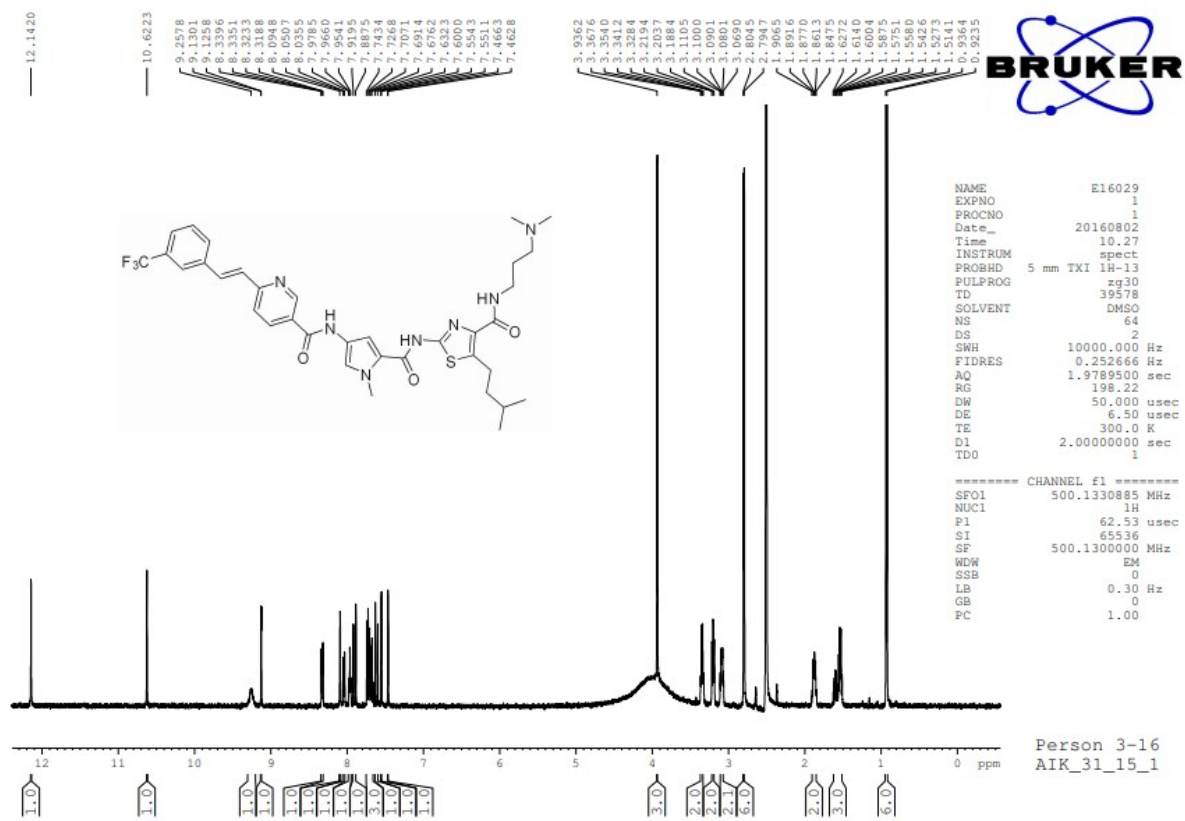

## HRMS

AIK-31-15-1 #59 RT: 1.69 AV: 1 NL: 7.47E8  
 T: FTMS {1,1} + p ESI Full lock ms [85.00-1200.00]

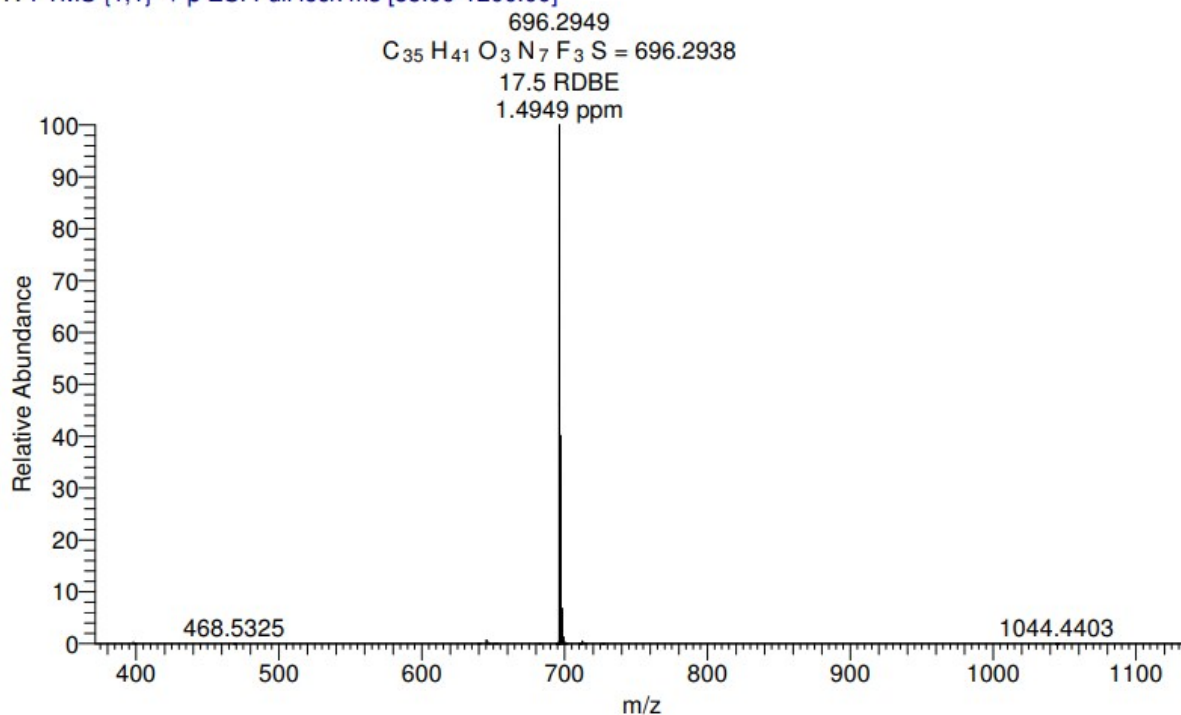

IR

AIK\_31\_15\_1

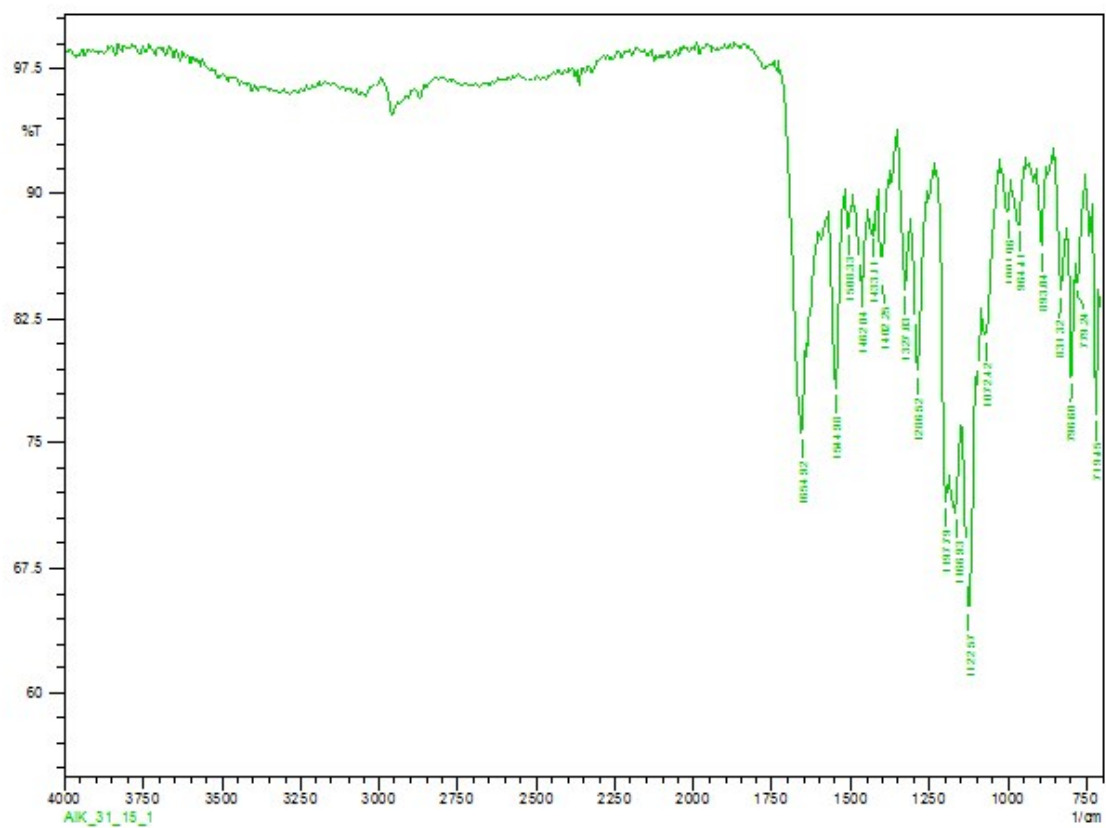

Peaks: 698, 698, 698, 698, 720, 779, 797, 831, 893, 964, 1001, 1072, 1123, 1167, 1198, 1287, 1327, 1402, 1433, 1462, 1508, 1545, 1655  $\text{cm}^{-1}$

# MGB-381

<sup>1</sup>H NMR (d<sub>6</sub>-DMSO)

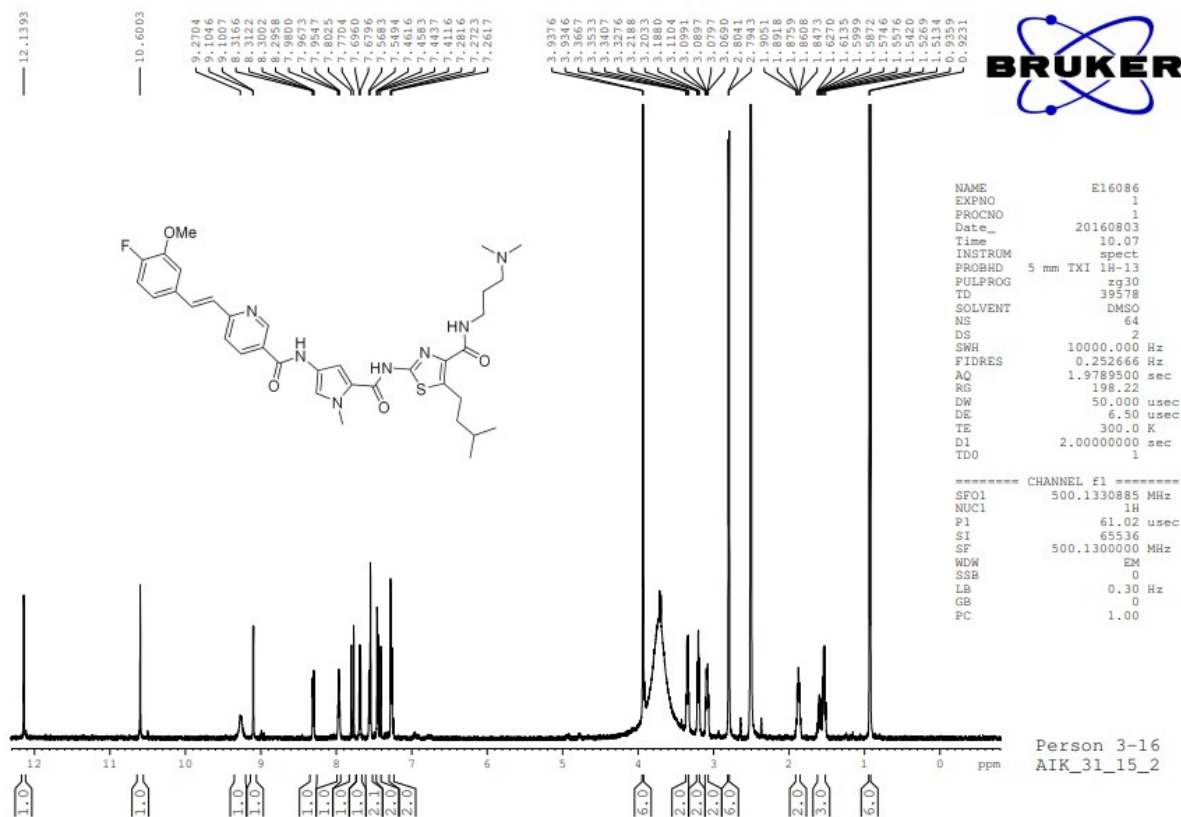

## HRMS

AIK-31-15-2 #49 RT: 1.43 AV: 1 NL: 4.86E8  
 T: FTMS {1,1} + p ESI Full lock ms [85.00-1200.00]

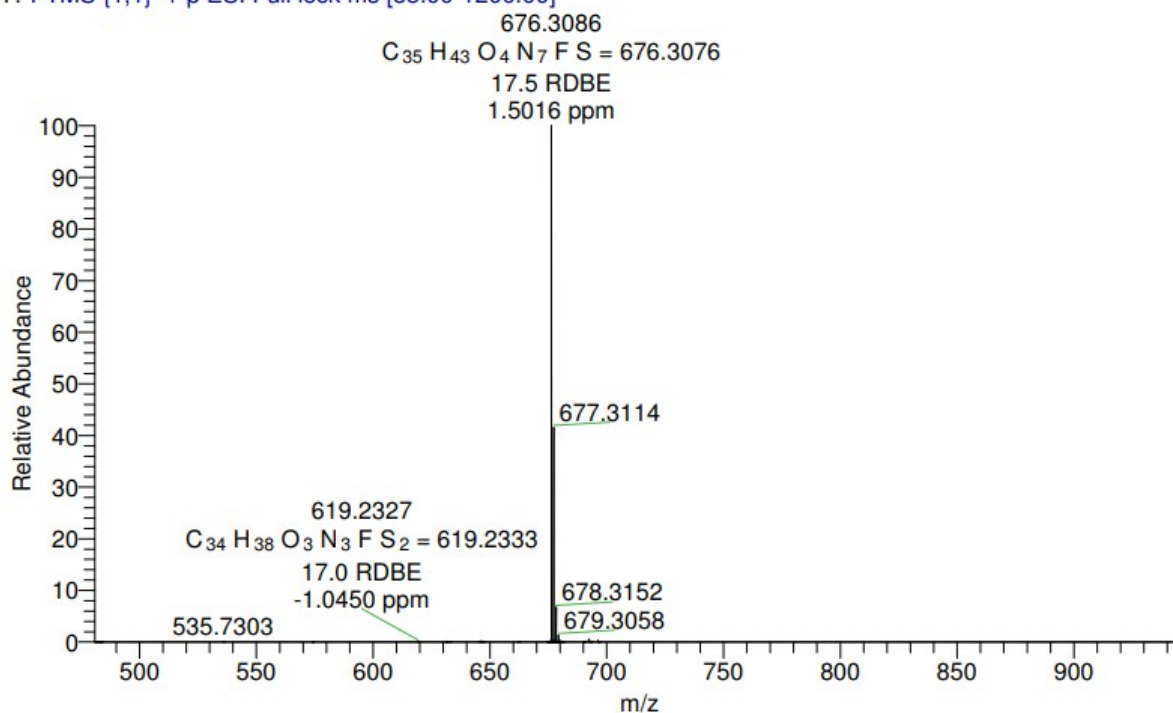

IR

AIK\_31\_15\_2

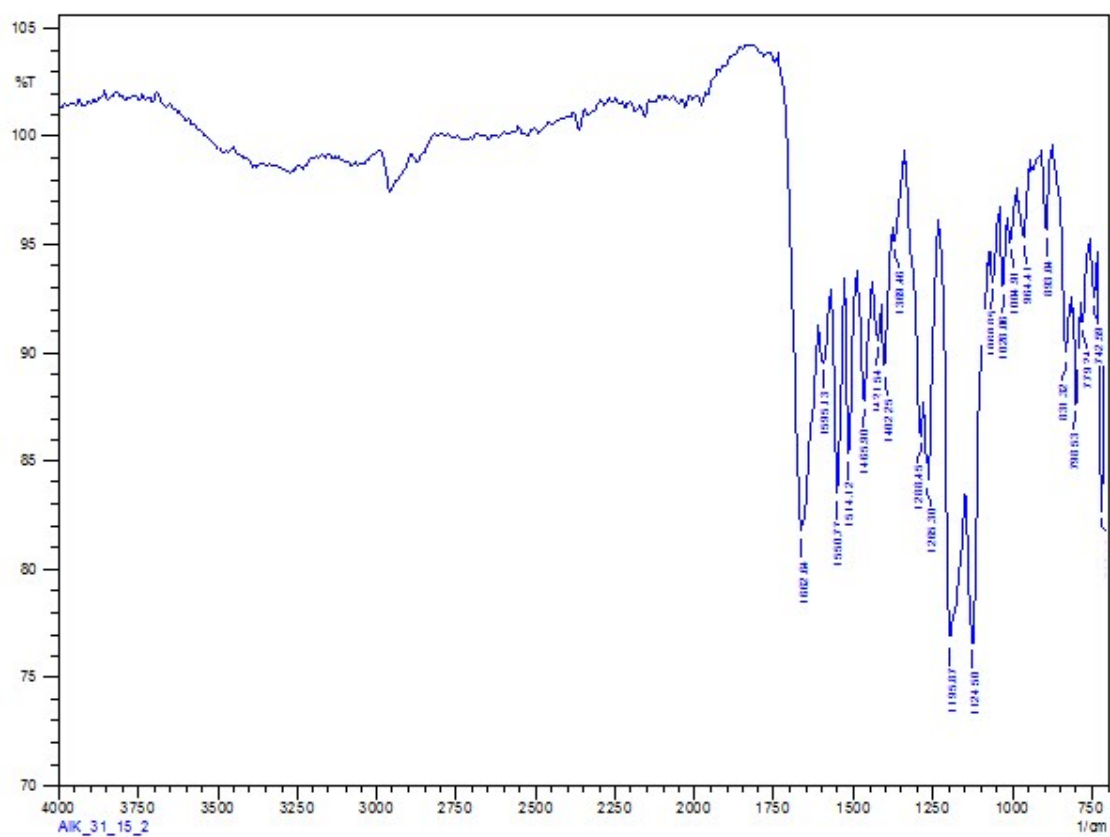

Peaks: 720, 743, 779, 799, 831, 893, 964, 1005, 1028, 1061, 1125, 1196, 1265, 1289, 1370, 1402, 1422, 1466, 1514, 1551, 1595, 1663  $\text{cm}^{-1}$

# MGB-382

## $^1\text{H}$ NMR ( $d_6$ -DMSO)

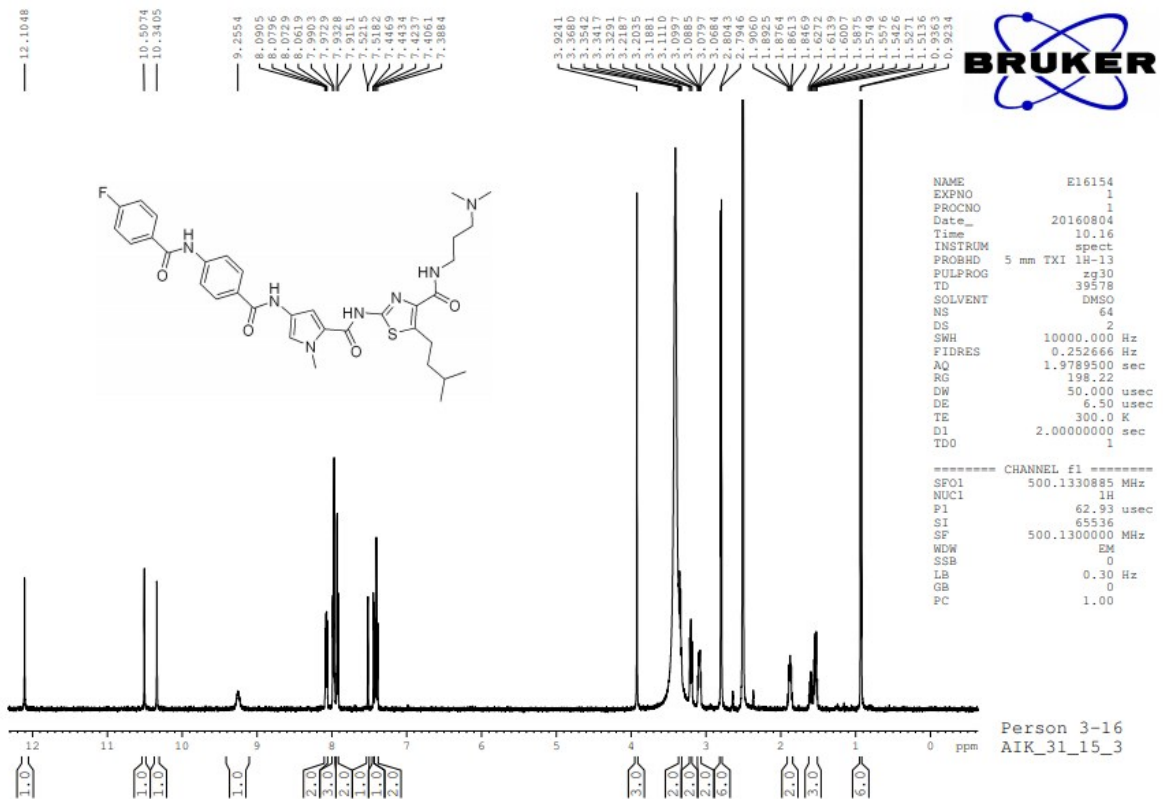

## HRMS

AIK-31-15-3 #43 RT: 1.27 AV: 1 NL: 6.54E8  
 T: FTMS {1,1} + p ESI Full lock ms [85.00-1200.00]

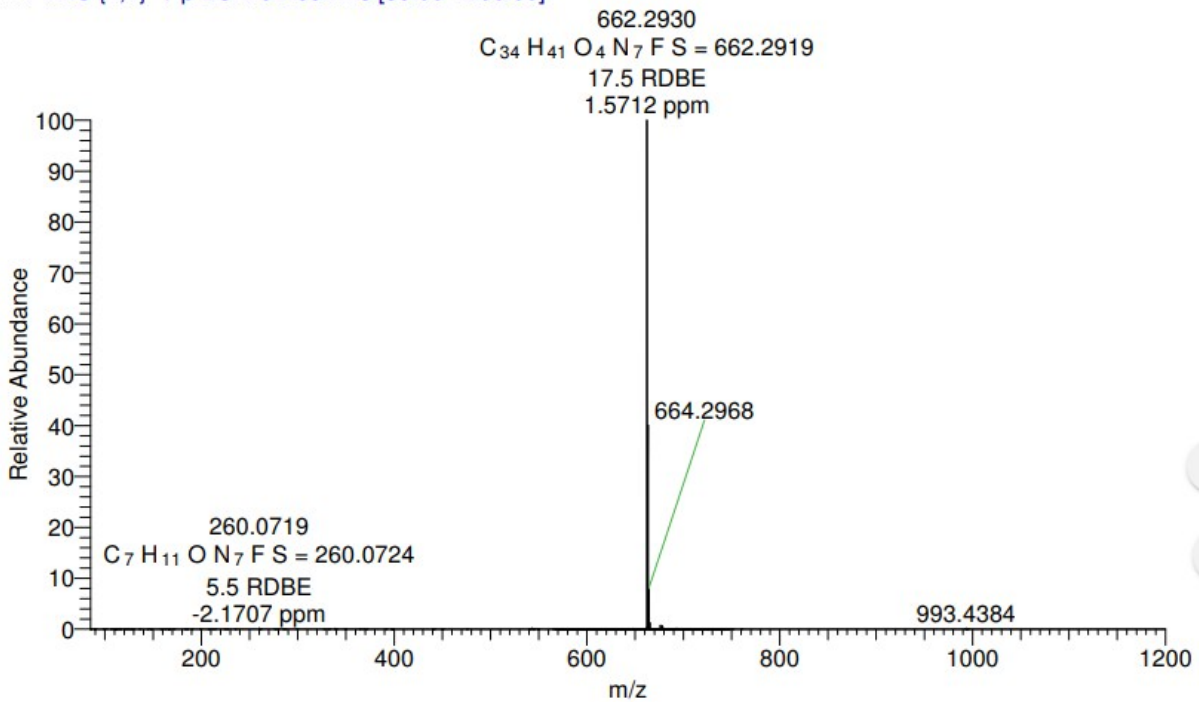

IR

AIK\_31\_15\_3

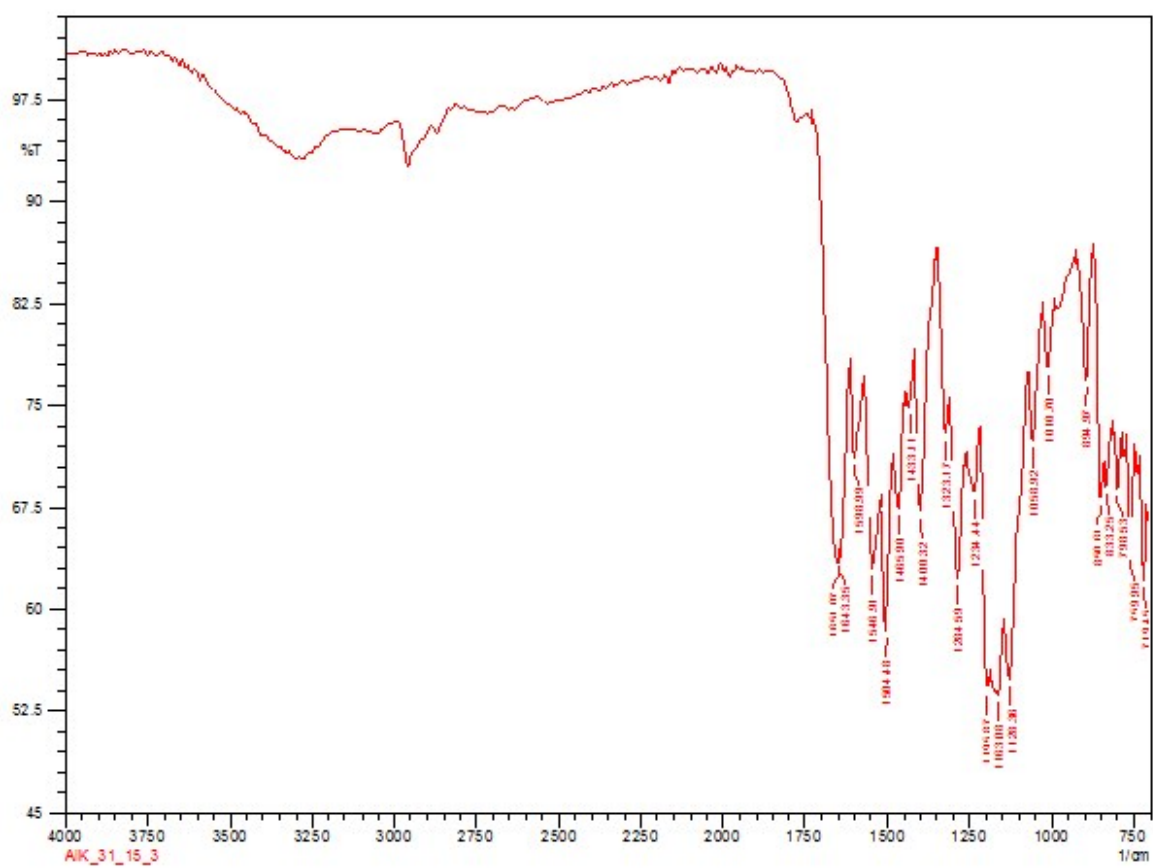

Peaks: 720, 760, 799, 833, 851, 895, 1011, 1059, 1128, 1163, 1196, 1234, 1285, 1323, 1400, 1433, 1466, 1505, 1547, 1599, 1643, 1651 cm<sup>-1</sup>

# MGB-385

<sup>1</sup>H NMR (d<sub>6</sub>-DMSO)

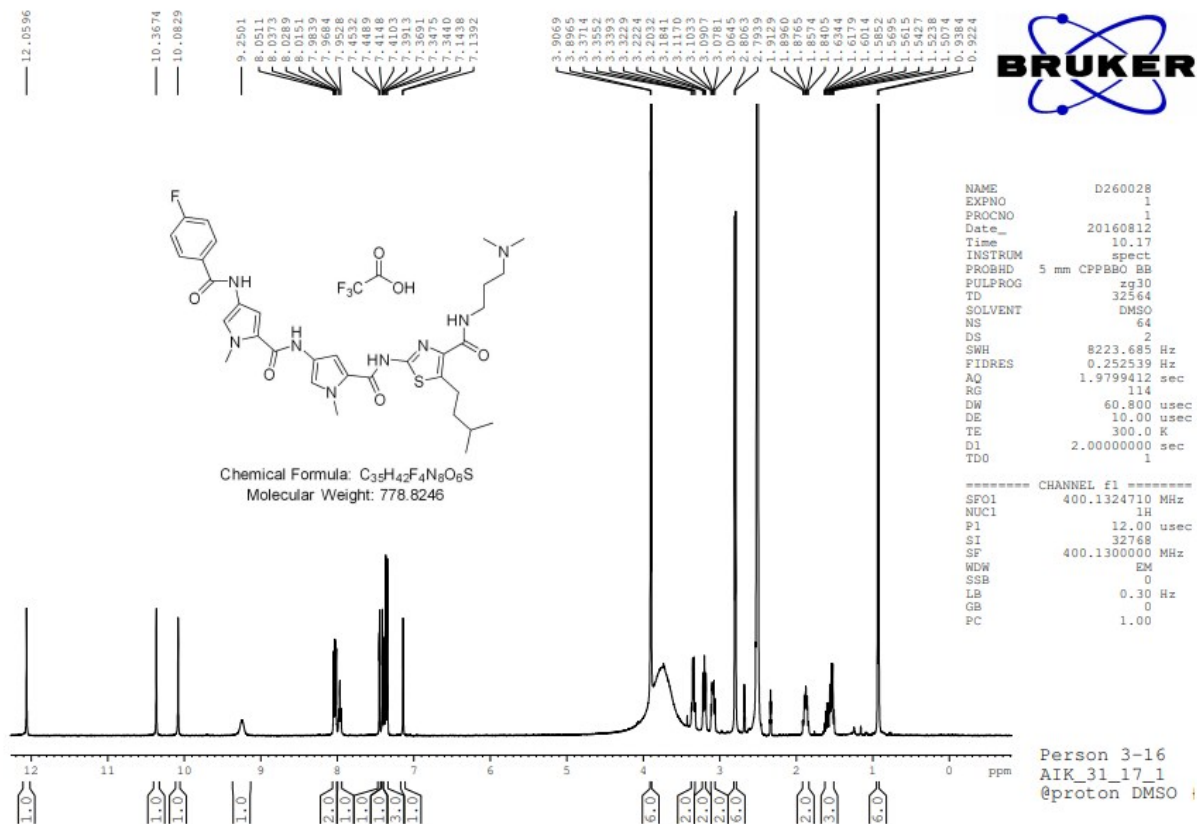

## HRMS

AIK-31-17-1 #43 RT: 1.27 AV: 1 NL: 4.85E8  
T: FTMS {1,1} + p ESI Full lock ms [85.00-1200.00]

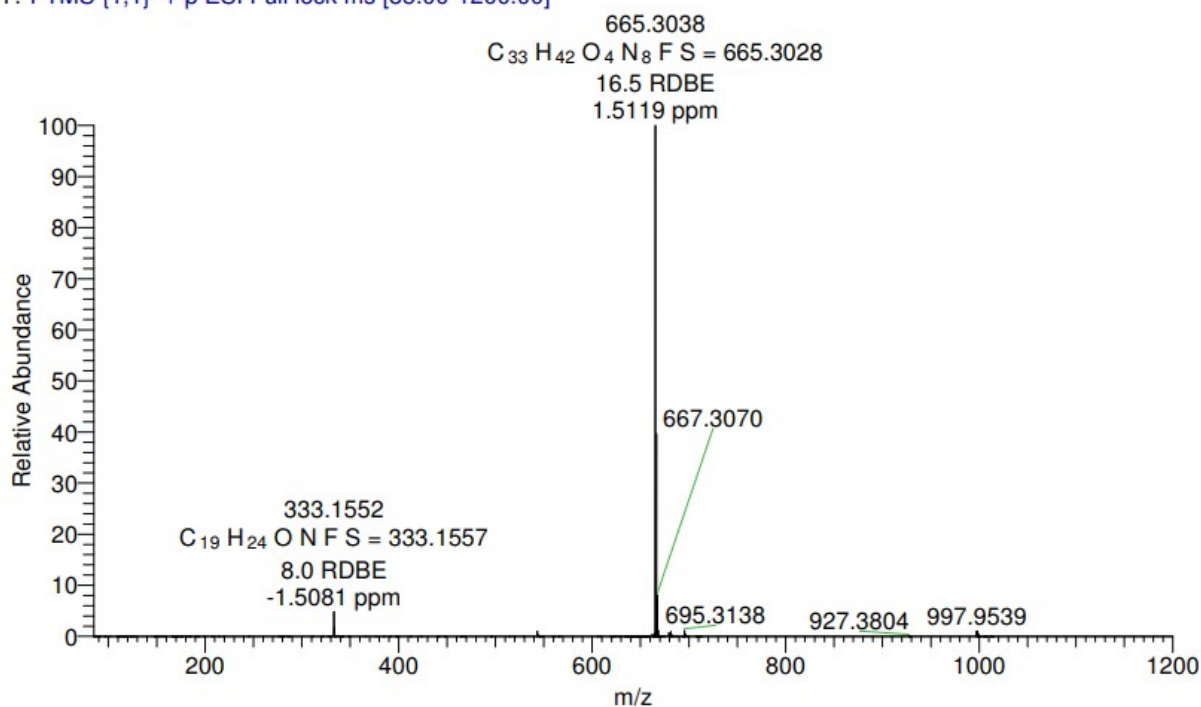

IR

AIK\_31\_17\_1

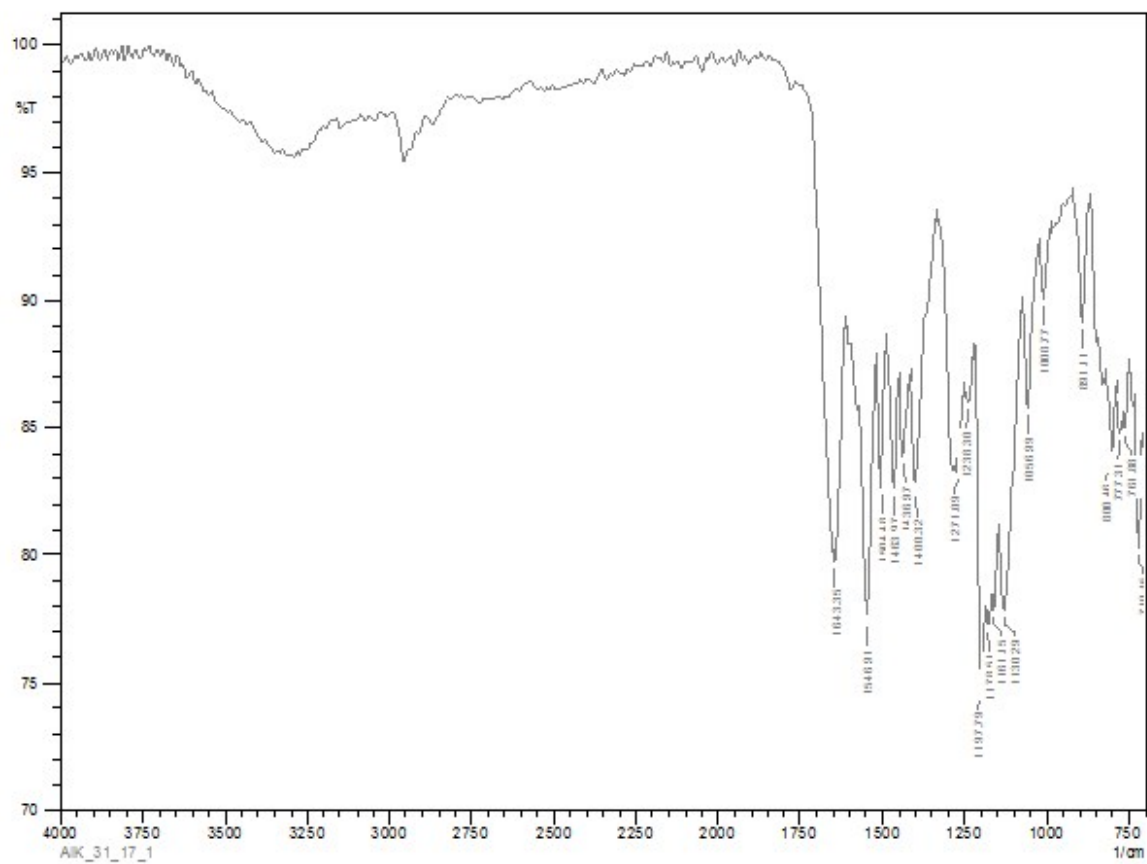

Peaks: 720, 762, 777, 801, 891, 1009, 1057, 1130, 1161, 1179, 1198, 1238, 1271, 1400, 1437, 1464, 1505, 1547, 1643 cm<sup>-1</sup>



# MGB-386

<sup>1</sup>H NMR (d<sub>6</sub>-DMSO)

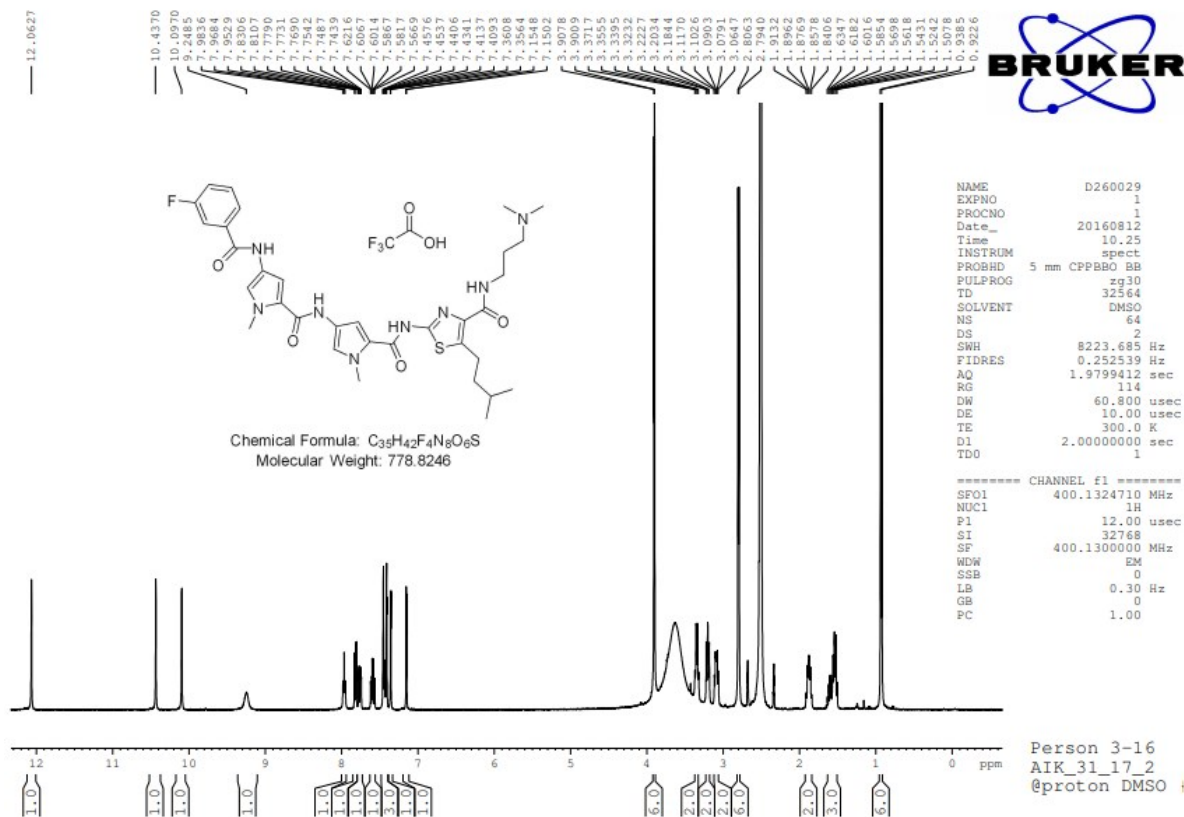

## HRMS

AIK-31-17-2 #43 RT: 1.28 AV: 1 NL: 4.47E8  
T: FTMS {1,1} + p ESI Full lock ms [85.00-1200.00]

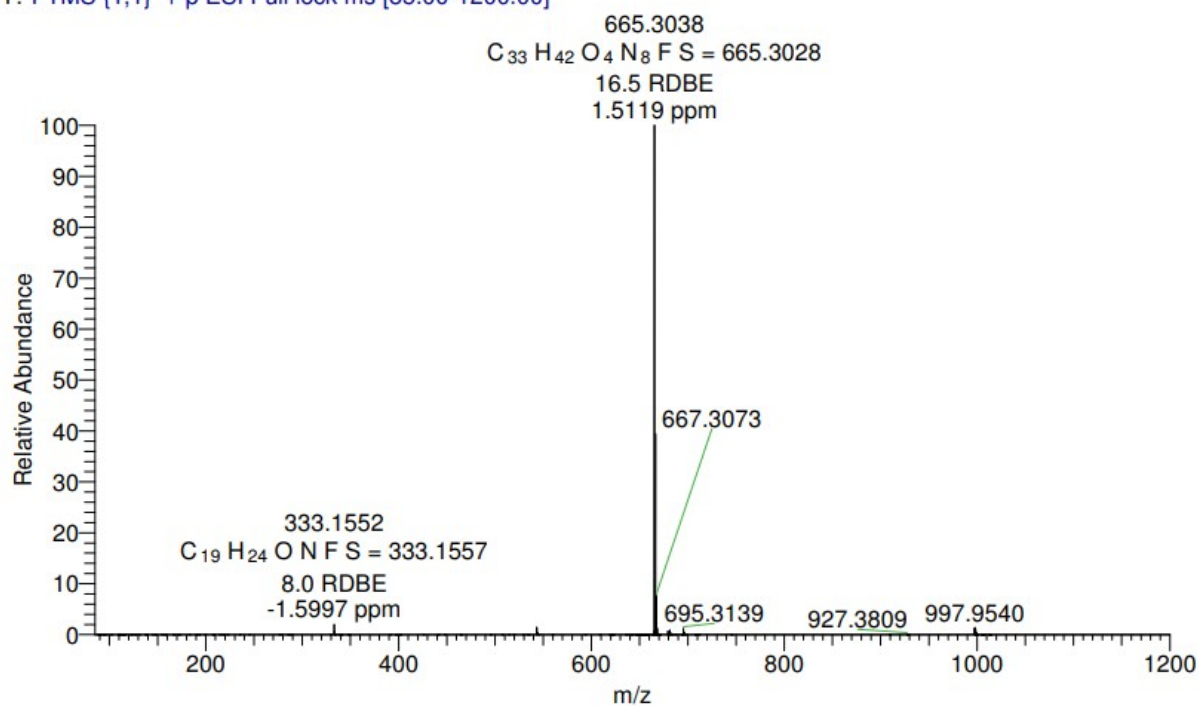

IR

AIK\_31\_17\_2

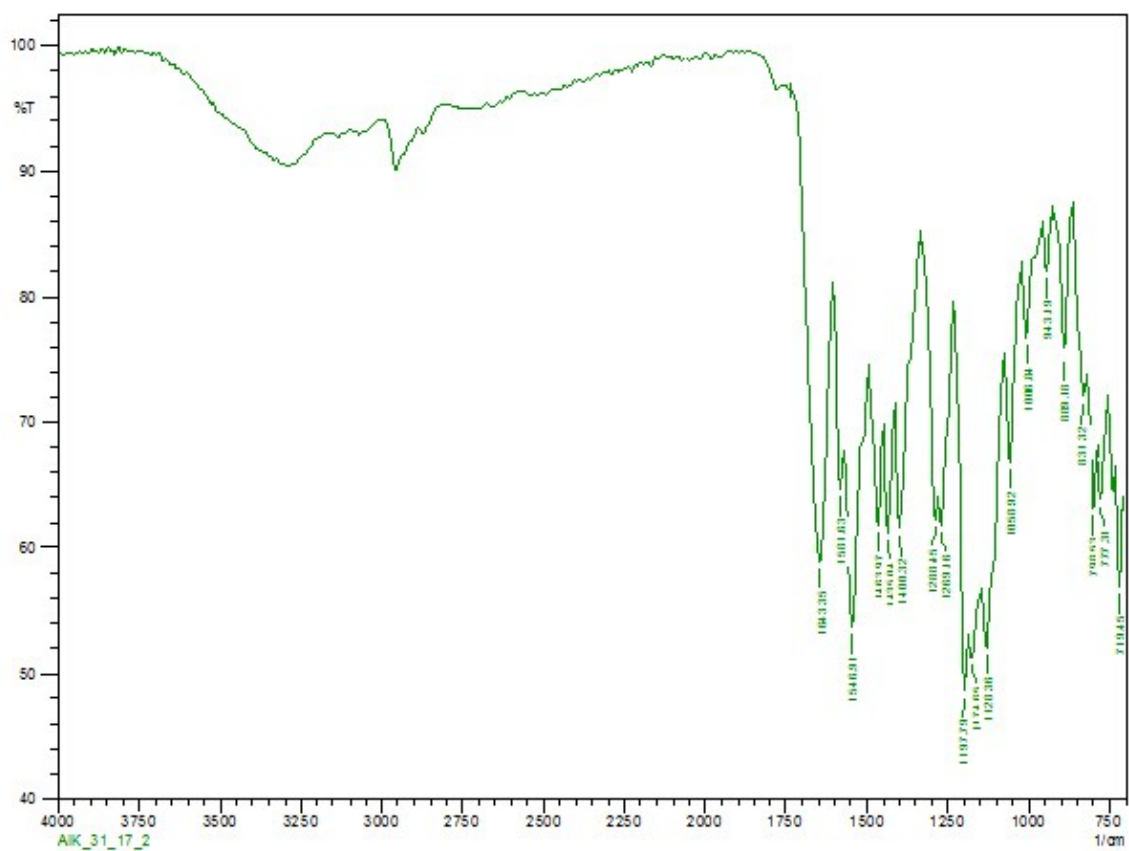

Peaks: 720, 777, 799, 831, 889, 943, 1007, 1059, 1128, 1175, 1198, 1269, 1289, 1400, 1435, 1464, 1547, 1582, 1643  $\text{cm}^{-1}$

# MGB-387

$^1\text{H}$  NMR ( $d_6$ -DMSO)

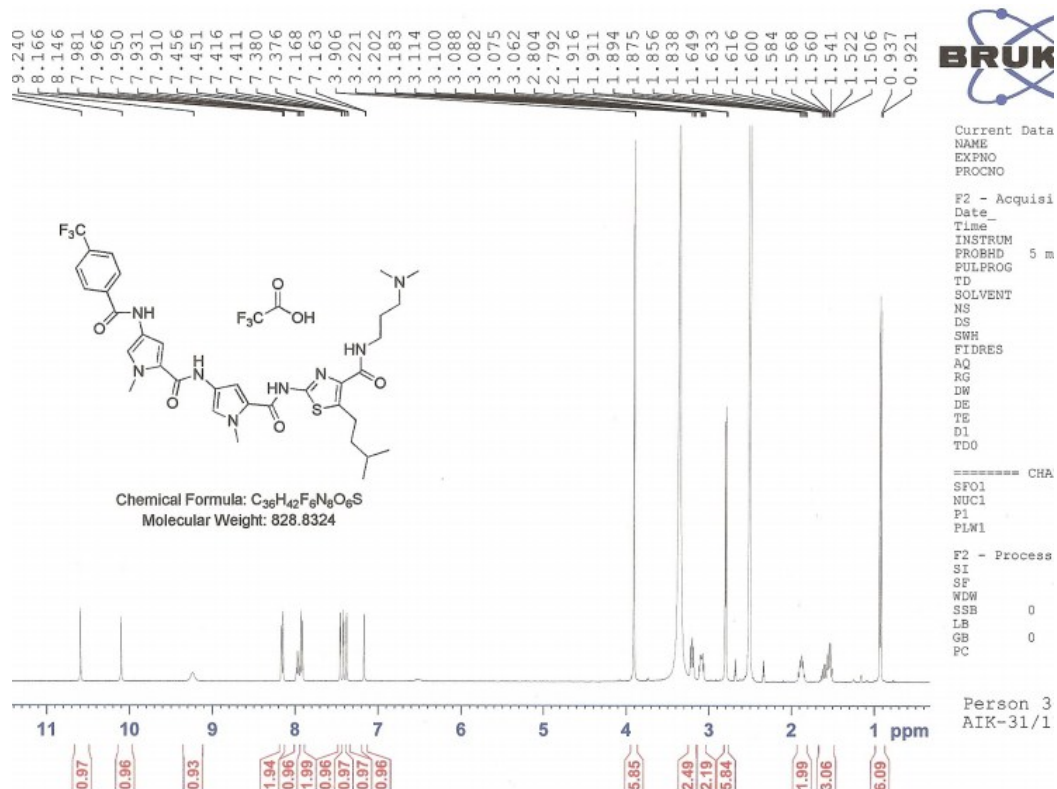

## HRMS

AIK-31-17-3 #49 RT: 1.43 AV: 1 NL: 6.81E8  
T: FTMS {1,1} + p ESI Full lock ms [85.00-1200.00]

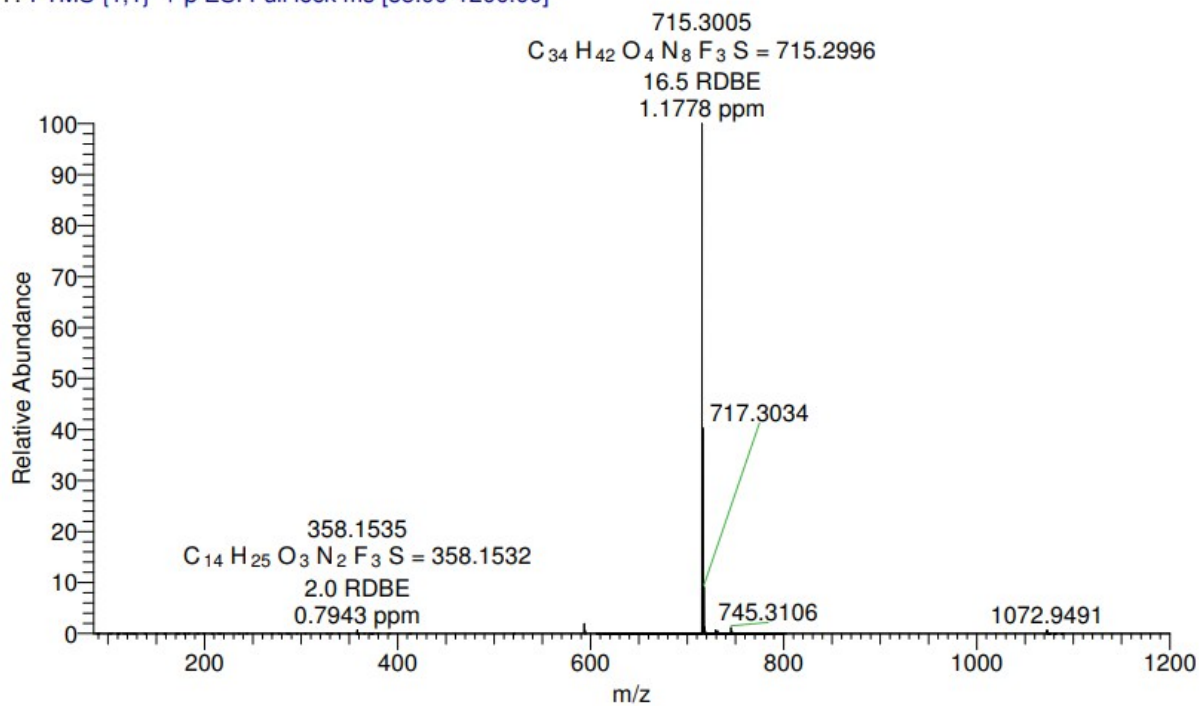

IR

AIK\_31\_17\_3

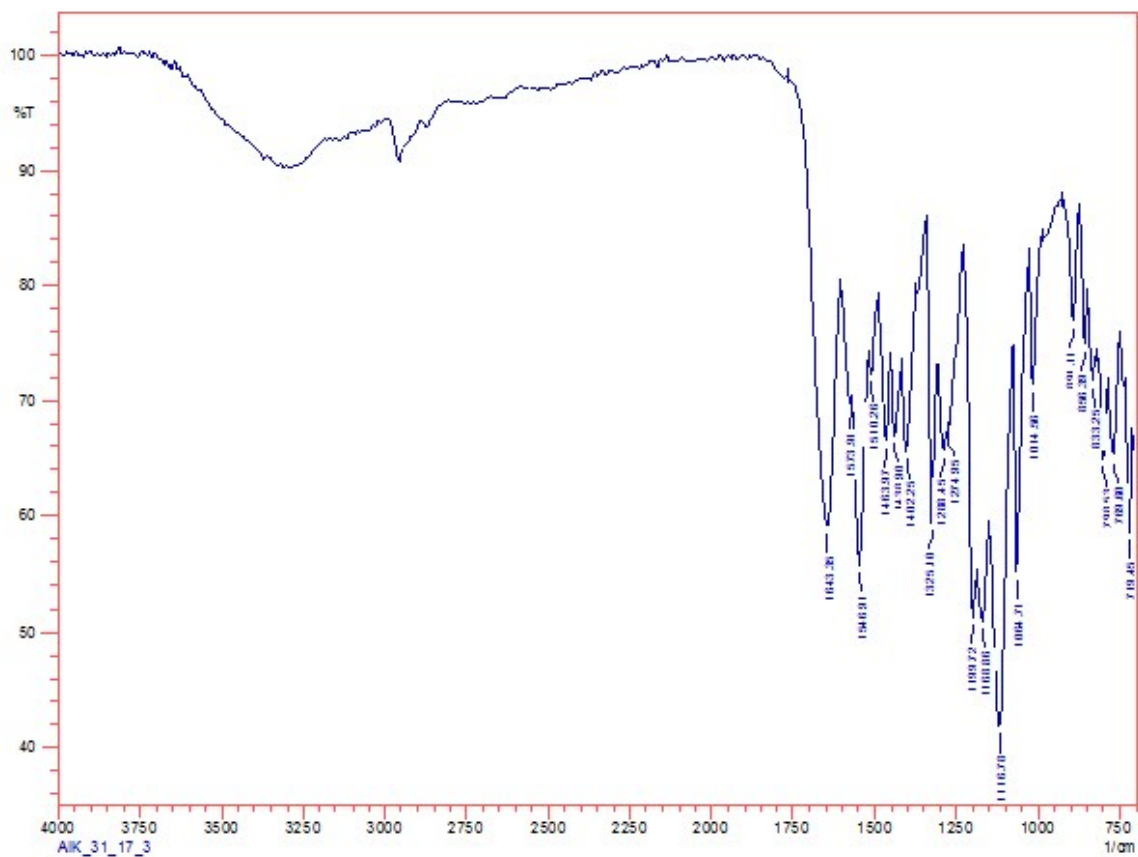

Peaks: 720, 770, 799, 833, 856, 891, 1015, 1065, 1117, 1169, 1200, 1275, 1289, 1325, 1402, 1439, 1464, 1510, 1547, 1574, 1643  $\text{cm}^{-1}$
